# Supplementary material for: Trends and abrupt changes in 104-years of ice cover and water temperature in a dimictic lake in response to air temperature, wind speed, and water clarity drivers
Source: Copernicus journal article supplement (doi:10.5194/hess-2015-488), 2016-01-19
Supplement: Supplementary file [file hess-2015-488-AC4-supplement.pdf]

1 **Trends and abrupt changes in 104-years of ice cover and**  
2 **water temperature in a dimictic lake in response to air**  
3 **temperature, wind speed, and water clarity drivers**

4  
5 **M. R. Magee<sup>1</sup>, C. H. Wu<sup>1</sup>, D. M. Robertson<sup>2</sup>, R. C. Lathrop<sup>3</sup>, and D. P. Hamilton<sup>4</sup>**

6 [1]{Civil and Environmental Engineering, University of Wisconsin-Madison, Madison,  
7 Wisconsin, USA}

8 [2]{Wisconsin Water Science Center, U.S. Geological Survey, Middleton, Wisconsin, USA}

9 [3]{Center for Limnology, University of Wisconsin-Madison, Madison, Wisconsin, USA}

10 [4]{Environmental Research Institute, University of Waikato, Hamilton, New Zealand}

11 Correspondence to: Chin .H. Wu (chinwu@engr.wisc.edu)

12  
13 **Abstract**

14 The one-dimensional hydrodynamic-ice model, DYRESM-WQ-I, was modified to simulate  
15 ice cover and thermal structure of dimictic Lake Mendota, WI, USA, over a continuous 104-  
16 year period (1911-2014). The model results were then used to examine the drivers of changes  
17 in ice cover and water temperature, focusing on the responses to shifts in air temperature,  
18 wind speed, and water clarity at multi-year time scales. Observations of the drivers include a  
19 change in the trend of warming air temperatures from 0.081 °C per decade before 1981 to  
20 0.334 °C per decade thereafter, as well as a shift in mean wind speed from 4.44 m s<sup>-1</sup> **before**  
21 **1994** to 3.74 m s<sup>-1</sup> **thereafter**. Observations show that Lake Mendota has experienced  
22 significant changes in ice cover: later ice on (9.0 days later per century), earlier ice-off (12.3  
23 days per century), decreasing ice cover duration (21.3 days per century), while model  
24 simulations indicate a change in maximum ice thickness (12.7 cm decrease per century).  
25 Model simulations also show changes in the lake thermal regime of: earlier stratification onset  
26 (12.3 days per century), later fall turnover (14.6 days per century), longer stratification  
27 duration (26.8 days per century), and decreasing summer hypolimnetic temperatures (-1.4 °C  
28 per century). Correlation analysis of lake variables and driving variables revealed ice cover

1 variables, stratification onset, epilimnetic temperature, and hypolimnetic temperature were  
2 most closely correlated with air temperature, whereas freeze-over water temperature,  
3 hypolimnetic heating, and fall turnover date were more closely correlated with wind speed.  
4 Each lake variable (i.e., ice-on and ice-off dates, ice cover duration, maximum ice thickness,  
5 freeze-over water temperature, stratification onset, fall turnover date, stratification duration,  
6 epilimnion temperature, hypolimnion temperature, and hypolimnetic heating) was averaged  
7 for the three periods (1911-1980, 1981-1993 and 1994-2014) delineated by abrupt changes in  
8 air temperature and wind speed. Average summer hypolimnetic temperature and fall turnover  
9 date exhibit significant differences between the third period and the first two periods.  
10 Changes in ice cover (ice-on and ice-off dates, ice cover duration, and maximum ice  
11 thickness) exhibit an abrupt change after 1994, which was related in part to the warm El Niño  
12 winter of 1997–1998. Under-ice water temperature, freeze-over water temperature,  
13 hypolimnetic temperature, fall turnover date, and stratification duration demonstrate a  
14 significant difference in the third period (1994–2014), when air temperature was warmest and  
15 wind speeds decreased rather abruptly. The trends in ice cover and water temperature  
16 demonstrate responses to both long-term and abrupt changes in meteorological conditions that  
17 can be complemented with numerical modelling to better understand how these variables will  
18 respond in a future climate.

19

## 20 **1 Introduction**

21 Many studies have shown that lake temperatures and ice cover can strongly affect water  
22 chemistry, individual organism physiology, population abundance, community structure, and  
23 food-web dynamics (King et al., 1997; Schindler et al., 1990). Air temperature, wind speed,  
24 and water clarity are important factors driving these lake ecosystem properties. Understanding  
25 how lakes respond to changes in these drivers is of great interest to predict how lakes may  
26 change in the future (Fang and Stefan, 2009; Magnuson et al., 1997; Robertson, 1989). The  
27 long-term response of lake ice and water temperature to changing air temperature and wind  
28 speed is integral to assessment of the potential impacts of climate change on water quality and  
29 ecology of lakes.

30 Over the past 100 years, climate has been changing and will continue to change (IPCC, 2013).  
31 Globally-averaged combined land and ocean surface temperature data show a linear warming  
32 trend of 0.85 °C from 1880–2012 (IPCC, 2013). This warming was most pronounced from

1 1979–2012, greater than 0.25 °C per decade (Hartmann et al., 2013). Increases in air  
2 temperature alter the ice cover of lakes (Butcher et al., 2015; Magnuson et al., 2000;  
3 Robertson et al., 1992) and affect their thermal structures (Robertson and Ragotzkie, 1990),  
4 evidenced by increasing epilimnetic temperatures (Arhonditsis et al., 2004; Dobiesz and  
5 Lester, 2009; Schindler et al., 1990), warming of the lake surface temperature (Schneider and  
6 Hook, 2010; Shimoda et al., 2011), increasing temperature gradient across the thermocline  
7 (Robertson and Ragotzkie, 1990; Wilhelm and Adrian, 2008), changing thermocline depth  
8 (King et al., 1997; Schindler et al., 1990), advancing the onset of summer stratification  
9 (Austin and Colman, 2007), delaying fall turnover (King et al., 1997), increasing the strength  
10 of thermal stratification (Rempfer et al., 2010), and prolonging the stratified period  
11 (Robertson and Ragotzkie, 1990; Wilhelm and Adrian, 2008).

12 Trends in wind speed over the last 30–50 years have been reported in several studies that have  
13 analyzed historical wind speed records across the globe (Jiang et al., 2009; Wan et al., 2010).  
14 Klink (2002) examined 22- to 35-year records (ranging between 1959–1995) of wind speed at  
15 seven stations in and around Minnesota and found decreasing annual wind speeds at five of  
16 the seven stations. Pryor et al.(2009) reported that the 50<sup>th</sup> and 90<sup>th</sup> percentile annual wind  
17 speeds over the period 1973–2005 across most of the U.S. have also decreased. Decreased  
18 wind speeds increase thermal stratification and can reduce whole-lake average temperature  
19 (Tanentzap et al., 2008). Interestingly, an opposing trend (increasing wind speed) has been  
20 observed in Lake Superior, North America, where the lake surface temperatures have been  
21 warming faster than air temperatures (Austin and Colman, 2007). Desai et al. (2009) suggest  
22 that the larger increase in water temperatures than air temperatures reduced the air-water  
23 temperature gradient and destabilized the atmospheric surface layer above Lake Superior,  
24 which resulted in increasing wind speed at a rate of nearly 5% per decade. Differences in  
25 wind-driven mixing may explain different temperature responses of hypolimnetic waters in  
26 large and small lakes (Winslow et al., 2015). While the importance of wind in lake heat  
27 transfer (Fu et al., 2009; Read et al., 2012), mixing, and thermal structure (Desai et al., 2009;  
28 Schindler et al., 1990) has been recognized, studies on the effects of wind speed alterations on  
29 seasonal ice cover and thermal structure of lakes are still rare.

30 Water clarity, which controls the amount of solar radiation penetrating into a lake, plays an  
31 important role in heat budgets in lakes. Increased water clarity can result in warmer deep  
32 waters (Stefan et al., 1996), while reduced light penetration can result in decreased mixing

1 depth and cooler deep waters (Hocking and Straškraba, 1999; Tanentzap et al., 2008).  
2 Previous studies have also shown that increased water clarity was correlated with deeper  
3 mixed-layer depth (Fee et al., 1996; Mazumder and Taylor, 1994; Schindler et al., 1996) and  
4 increased hypolimnetic heating rate (Yan, 1983). Water clarity has important consequences  
5 for photosynthesis and vertical distribution of biota. Accompanied by a warming climate,  
6 increased evaporation and changes in precipitation patterns can alter the inputs of nutrients  
7 and dissolved organic carbon (DOC) into lakes, resulting in changes in water clarity  
8 (Schindler et al., 1990, 1996).

9 Abrupt shifts, rather than linear changes, can occur in both climate and lake variables over  
10 long time scales. In the past, the majority of referenced studies used some form of linear  
11 regression analysis to look for changes, which assumes that lakes undergo monotonic changes  
12 over time (Van Cleave et al., 2014). This assumption can mask the occurrence of step changes  
13 (Liu et al., 2013; North et al., 2013) and can hide the underlying mechanisms that are  
14 responsible for the changes (North et al., 2014). As noted in other studies (Mueller et al.,  
15 2009; Van Cleave et al., 2014), long-term changes in lake thermodynamic variables can be  
16 associated with a pronounced, nonlinear step change that indicates a rapid switch between  
17 stable states or regimes (North et al., 2013; Rodionov, 2004; Scheffer et al., 2001). Identifying  
18 this type of abrupt change in climate drivers and corresponding abrupt or gradual change in  
19 lake variables may shed light on the role of changing climate on the corresponding ecosystem.

20 The purpose of this study is to investigate how long-term changes in air temperature, wind  
21 speed, and water clarity affect the ice cover and thermal structure of a dimictic Lake Mendota,  
22 Wisconsin, USA during the past century using a long-term 104-year simulation model. We  
23 hypothesize that changes in lake ice cover (ice-on and ice-off dates, ice cover duration, and  
24 maximum ice thickness) and thermal structure (stratification onset, fall turnover date,  
25 stratification duration, water temperatures, hypolimnetic heating) variables may be  
26 characterized by periods of abrupt change rather than gradual trends, based on observations of  
27 rapid change in the climate drivers of air temperature and wind speed. To address this, a one-  
28 dimensional hydrodynamic model with ice cover is employed to simulate long-term (1911-  
29 2014) ice cover and water temperature in the lake. With the knowledge of lake responses to  
30 these past conditions, we aim to reveal how lakes might respond to future changes in air  
31 temperature, wind speed, and water clarity.

## 1 2 Methods

### 2 2.1 Hydrodynamic model

3 An ice and snow model was added to the DYRESM-WQ model (Hamilton and Schladow  
4 1997), a physically-based one-dimensional hydrodynamic model for simulating vertical  
5 mixing and advective transport in lakes and reservoirs. The resulting model, DYRESM-WQ-I  
6 (Hsieh, 2012), is used to simulate daily changes in the vertical distribution of water  
7 temperature and ice cover in Lake Mendota from 1911-2014. In this model, the lake is  
8 represented by a series of Lagrangian horizontal layers with uniform properties that may  
9 change in elevation and thickness in response to inflows/outflows and surface mass fluxes  
10 (evaporation and precipitation). Layer thickness is updated using an algorithm to give  
11 appropriate vertical density resolution at each time step. Mixing in the model is represented  
12 by merging the layers when the sum of available turbulent kinetic energy (TKE) produced by  
13 wind stirring, convective turnover, and shear stress exceeds the potential energy required to  
14 mix the adjacent layer below. Hypolimnetic mixing is modeled with an eddy diffusivity  
15 coefficient, which is a function of the dissipation of TKE and strength of stratification. More  
16 detailed descriptions of the simulation of water temperature and mixing are provided by  
17 Imberger and Patterson (1981).

18 The ice model is based upon the MLI model of Rogers et al., (1995) with alterations to two-  
19 way coupling of the water-column dynamics to the ice model and the addition of time-  
20 dependent sediment heat flux for all horizontal layers. Ice growth in the model is based upon  
21 a quasi-steady state assumption that the time scale for heat conduction through the ice is short  
22 relative to the time scale of meteorological forcing (Patterson and Hamblin, 1988; Rogers et  
23 al., 1995). This assumption is valid under a Stefan Number  $<0.1$  (Hill and Kucera, 1983). The  
24 ice module is applied when the simulated surface water temperature first drops below 0 °C;  
25 the initial ice thickness is set to a value of 5 cm to address effects of partial ice cover  
26 (Patterson and Hamblin, 1988; Vavrus et al., 1996). Upward conductive heat flux between  
27 ice/snow cover and the atmosphere,  $q_0$ , is determined by numerically solving the quasi-  
28 steady state heat conduction equations (Rogers et al., 1995) and assigning appropriate  
29 boundary conditions to the water, ice, and atmospheric interfaces. At the ice (or snow)  
30 surface, a heat flux balance provides the condition for surface melting, and accretion or  
31 ablation of ice is determined through the heat flux at the ice-water interface. Imbalance

1 between heat conduction through ice and the heat flux from the water to the ice gives the rate  
 2 of change of ice thickness at the ice-water interface. Snow conductivity is estimated from its  
 3 density using an empirical equation (Ashton, 1986), and snow compaction is based on an  
 4 exponential decay formula (McKay, 1968), with snow compaction parameters based on air  
 5 temperature and snowfall/rainfall (Rogers et al., 1995). Snow (white) ice is generated in  
 6 response to flooding, when the mass of snow that can be supported by the ice cover is  
 7 exceeded. The uppermost solid layer of ice or snow is adjusted in thickness at the end of each  
 8 1-hr model time step according to the balance of the heat budget. When ice thickness  
 9 decreases to less than 5 cm, open water conditions are restored.

10 Sediment heat flux, the main external source of heat after freezing, is important to water  
 11 temperatures beneath ice cover (Ellis et al., 1991). Sediment heat flux (Fang and Stefan,  
 12 1996a) is included as a source/sink term for each Lagrangian layer to closely simulate under-  
 13 ice water temperatures. A simple diffusion relation (Rogers et al., 1995) is used to estimate  
 14 heat transfer from the sediments to the water column,  $q_{sed}$ :

$$15 \quad q_{sed} = K_{sed} \frac{dT}{dz} . \quad (1)$$

16 where  $K_{sed}$  is the sediment conductivity ( $=1.2 \text{ W m}^{-1} \text{ }^\circ\text{C}^{-1}$ ).  $dT/dz$ , the temperature gradient  
 17 across the sediment-water interface, is estimated as:

$$18 \quad \frac{dT}{dz} \approx \frac{T_s - T_w}{z_{sed}} . \quad (2)$$

19 where  $T_s$  is the sediment temperature,  $T_w$  is the water temperature adjacent to the sediment  
 20 surface, which varies hourly and with depth, and  $z_{sed}$  is the distance beneath the water-  
 21 sediment interface at which the sediment temperature becomes largely invariant. From data  
 22 collected at four locations on Lake Mendota (Birge et al., 1927), it was found that sediment  
 23 temperatures varied little at 5 m depth below the sediment-water interface, so  $z_{sed}$  is set to be 5  
 24 m. In addition, data from Birge et al., (1927) is used to fit a curve to describe the seasonal  
 25 variation of  $T_s$

$$26 \quad T_s = 9.7 + 2.7 \sin \left[ \frac{2\pi(D-151)}{TD} \right] \quad (3)$$

27 where D is the number of days from the start of the year and TD is the total number of days  
 28 for the year of interest (365 or 366). The vertical transfer of heat in the water column beneath

1 the ice is regulated by an assigned thermal diffusion coefficient. The formulation is the same  
2 as that originally used in DYRESM-WQ (Hamilton and Schladow, 1997) to simulate heat  
3 transfer throughout the open water period. This produced diffusivities that were within the  
4 range of measurements by Ellis et al., (1991) of 1-3 times greater than molecular values.

5 Input for the model includes lake morphometry (lake volume and surface area as a function of  
6 elevation), initial vertical profiles for water temperature and salinity, Secchi depth,  
7 meteorological variables, and inflows/outflows. The model calculates the surface heat fluxes  
8 using meteorological variables: total daily shortwave radiation, daily cloud cover, air vapor  
9 pressure, daily average wind speed, air temperature, and precipitation. During the simulation,  
10 all parameters/coefficients in the model are kept constant. The time step in the model for  
11 calculating water temperature, water budget, and ice thickness was set to 1 hr. Snow ice  
12 compaction, and snowfall and rainfall components are updated at a daily time step,  
13 corresponding to the frequency of meteorological data input. Cloud cover, air pressure, wind  
14 speed, and air temperature are assumed to be constant throughout the day, and precipitation is  
15 assumed uniformly distributed. Shortwave radiation distribution throughout the day is  
16 computed based on the lake latitude and the day or year. The DYRESM-WQ-I model is  
17 calibrated using measured lake variables including water level, temperature profiles, ice  
18 thickness, and ice on and ice off dates. The overall simulation period was 104 years, starting  
19 with an isothermal (measured) water column temperature of 3.1 °C on 7 April 1911 and  
20 ending on 31 October 2014.

## 21 **2.2 Model calibration**

22 The model was calibrated for the period 1995-2014 by varying the minimum layer thickness  
23 over values ranging from 0.05 m to 0.5 m at 0.025 m intervals. Layer thickness values were  
24 evaluated for the least amount of deviation between predicted and observed temperature  
25 values for Lake Mendota over the period. Based on this analysis, a minimum layer thickness  
26 of 0.125 m was chosen as the best setting to predict water temperature at all depths. Other  
27 parameter values in the hydrodynamic and ice cover models were obtained from literature  
28 values (Table 1). To evaluate the performance of the model, root-mean square error (RMSE)  
29 was used to compare simulated and observed ice cover and water temperature values for the  
30 full model period (1911-2014; see Sect. 4.2). Simulated and observed values are compared

1 directly, with the exception of aggregation of water temperature measurements to daily  
2 intervals where sub-daily intervals were available.

### 3 **2.3 Piecewise regression algorithm**

4 Breakpoints in the air temperature trend over the study period were determined using a  
5 piecewise linear regression (PLR) method (Tomé and Miranda, 2004; Toms and Lesperance,  
6 2003; Ying et al., 2015) that assumes continuity in the trendlines across the breakpoint. The  
7 piecewise linear regression model finds the breakpoint,  $B$ , that minimizes the residual sum of  
8 squares ( $RSS_{PLR}$ ) of the model between the two phases (Ying et al., 2015)

$$9 \quad RSS_{PLR} = \sum_{i=1}^n \left[ y_i - a - k_1 x_i - (k_2 - k_1) \max(x_i - B, 0) \right]^2 \quad (4)$$

10 where  $x_i$  and  $y_i$  are the time and air temperature data corresponding to the  $i$ -th data point,  
11 respectively, and  $k_1$  and  $k_2$  are the slopes of the linear fit to data before and after the  
12 breakpoint  $B$ . The parameter  $a$  is the intercept of the linear fit to data below the estimated  
13 breakpoint  $B$ , and  $n$  is the series length.

14 An  $F$ -test was used to compare the residual sum of squares of an ordinary linear regression  
15 model with the piecewise linear regression model with a level of  $\alpha = 0.05$  used to indicate  
16 significance, and the breakpoint year was determined to pass with  $p = 0.0016$ .

### 17 **2.4 Sequential t-test analysis of abrupt changes**

18 Abrupt changes in mean annual wind speeds and lake ice cover and temperature variables  
19 were detected using the sequential t-test STARS (Rodionov, 2004), which can automatically  
20 detect multiple change points. A shift occurs when a statistically significant difference exists  
21 between the mean value of the variable before and after a certain point based on the t-test. The  
22 variables were tested using a threshold significance level  $p = 0.05$ , a Huber weight parameter,  
23  $h = 1$  (North et al., 2013; Rodionov, 2006), and a cut-off length  $L = 15$  years (North et al.,  
24 2013).



## 1 **3 Model input data**

### 2 **3.1 Bathymetry**

3 Lake Mendota (43°40'N, 89°24'W) has a surface area of 39.4 km<sup>2</sup> and maximum fetch of 9.8  
4 km (Kitchell, 2012). The mean depth is 12.7 m, and maximum depth is 25.3 m. For detailed  
5 bathymetry refer to Kamarainen et al., (2009).

### 6 **3.2 Meteorological variables**

7 Daily meteorological data required to run the DYRESM-WQ-I model include solar radiation,  
8 air temperature, vapor pressure, wind speed, cloud cover, rainfall, and snowfall. Daily air  
9 temperatures are computed as the average of daily maximum and minimum temperatures.  
10 Vapor pressure, wind speed, and cloud cover are also entered as daily average values while  
11 solar radiation, rainfall, and snowfall are daily accumulation values.

12 Meteorological data for the Madison area have been continuously recorded since 1869,  
13 however, the station and techniques have changed several times. Robertson (1989)  
14 constructed a continuous, homogeneous daily meteorological dataset from 1884 to 1988 by  
15 adjusting for changes in site location and observation time, and resultant changes in the  
16 surface roughness (e.g. height of surrounding trees and buildings). These data were appended  
17 with data from the most recent weather station of the National Climate Data Center (NCDC,  
18 NOAA) located in Madison (MSN) Dane County Regional Airport (Truax Field), the same  
19 site as that used in 1988. All data except solar radiation can be obtained for Madison (MSN)  
20 from <http://www.ncdc.noaa.gov/>, except Solar Radiation which can be obtained from  
21 <http://www.sws.uiuc.edu/warm/weather/>. Since Robertson (1989) adjusted all historical data  
22 to that collected in 1988, no adjustments are applied to the recent data except for wind. In  
23 1996, a discontinuity in the wind record was caused by change in observational techniques  
24 and sensor locations (McKee et al., 2000). To address the non-climatic changes in wind  
25 speed, data from MSN are carefully compared with those collected from the tower of the  
26 Atmospheric and Oceanic Science Building at the University of Wisconsin-Madison  
27 (<http://ginsea.aos.wisc.edu/labs/mendota/index.htm>). Hourly data from both sites ( $U_{MSN, \text{hourly}}$   
28 and  $U_{AOS, \text{hourly}}$ ) during 2003–2010 were used to form a  $4 \times 12$  (four components of wind  
29 direction  $\times$  12 months) matrix ( $K_{4,12}$ ) of wind correction factors, yielding  $U_{AOS, \text{daily}} =$   
30  $K_{i,j} \times U_{MSN, \text{daily}}$ . A comparison of results indicated that the MSN weather station measured a

1 higher magnitude in winds out of the east by 5% and lower magnitude in winds out of the  
2 west and south by 30% and 10%, respectively. The adjusted wind data ( $=K_{i,j} \times U_{MSN,daily}$ ) are  
3 used in the model simulation. Overall the adjusted wind data show a decline in mean wind  
4 velocities of 16% from 1988–93 to 1994–2014) compared to 7% at a nearby weather station  
5 with no known observational changes (St. Charles, Illinois; 150 km southeast of Lake  
6 Mendota).

### 7 **3.3 Light extinction**

8 Seasonal Secchi depths can be used to determine the light extinction coefficient for  
9 DYRESM-WQ-I. Lathrop et al., (1996) compiled Secchi depth data for Lake Mendota  
10 between 1900 and 1993 (1,701 daily Secchi depth readings from 70 calendar years), and  
11 summarized the data for six seasonal periods: winter (ice-on to ice-out), spring turnover (ice-  
12 out to 10 May), early stratification (11 May to 29 June), summer (30 June to 2 September),  
13 destratification (3 September to 12 October), and fall turnover (13 October to ice-on). After  
14 1993, Secchi depths were obtained from the North Temperate Lakes – Long Term Ecological  
15 Research (NTL-LTER) (<https://portal.lternet.edu/nis/home.jsp#>). For years with no Secchi  
16 data, the long-term mean seasonal Secchi depth was used to estimate light extinction. Light  
17 extinction coefficients are calculated as a function of Secchi depth using the equation,  
18  $k = 1.1 / z_s^{0.73}$  (Williams et al., 1980), where  $k$  is the light extinction coefficient and  $z_s$  is the  
19 measured Secchi depth, in meters.

### 20 **3.4 River inflow and outflow**

21 Daily inflow measurements have been made on selected Lake Mendota tributaries since 1974,  
22 and daily outflow from the lake has been measured since 1975. Streamflow for the tributaries  
23 were obtained from: <http://waterdata.usgs.gov/wi/nwis/sw/>. Daily outflow from 1975 to 1997  
24 were calculated from gate/lock/by-pass pipe USGS ratings and local governmental daily  
25 operational records. Daily out from 1998 to 2003 were estimated from monthly outflow  
26 estimates from downstream Lake Waubesa and Mendota outlet data from earlier years. Daily  
27 outflow from 2003 to the present, were obtained from  
28 [http://waterdata.usgs.gov/wi/nwis/uv/?site\\_no=05428000](http://waterdata.usgs.gov/wi/nwis/uv/?site_no=05428000). These measurements were used to  
29 calculate total daily inflow and outflow. Total daily inflow and outflow from 1930 to 1974  
30 were estimated from measurements made at the gauging station downstream of the lake using

1 the drainage-area ratio method (Maidment, 1993). Prior to 1930, total inflow and outflow  
2 were calculated using a water budget approach, i.e., the balance of inflow/outflow,  
3 precipitation, evaporation, and lake level changes. The inflow/outflow is the residual  
4 unknown term of the water balance where other terms include evaporation, rainfall, and water  
5 level. The calculation is performed at the interval of water level measurements and the  
6 residual term is then distributed evenly across the number of days between water level  
7 measurements. Water level of Lake Mendota has been recorded since 1916 at the Yahara  
8 River inlet in the north of the lake (<http://waterdata.usgs.gov/wi/nwis/dv>). Prior to 1916, the  
9 long-term mean lake level was assumed in water budget calculations. River water temperature  
10 has been recorded at the Yahara River inlet since 2002 (U.S. Geological Survey,  
11 <http://waterdata.usgs.gov/nwis>). To estimate daily river temperatures prior to 2002, river  
12 temperatures were estimated from air temperatures (Hsieh, 2012). A linear regression was  
13 used to correlate river temperatures and weekly average air temperature data during 2002–  
14 2009 for air temperatures above the freezing temperature ( $r^2 = 0.86$ ), and a separate  
15 polynomial regression analysis was performed for air temperatures below the freezing  
16 temperature ( $r^2 = 0.68$ ).

### 17 **3.5 Lake ice cover and water temperature**

18 Observed ice cover data from 1911–2014 (available at NTL-LTER website:  
19 <https://portal.lternet.edu/nis/home.jsp#>), showed that Lake Mendota, on average, freezes on  
20 22 December (ice-on date), breaks up on 31 March (ice-off date), and has an ice duration of  
21 98 days. Ice thickness and snow depth during the study period were compiled from various  
22 sources: 1911–1916 (unpublished data from E. Birge, University of Wisconsin); daily ice  
23 thickness during 1961–1962, 1962–1963, and for part of the winter 1963–1964 (Stewart,  
24 1965); 1975–1995 (unpublished data, D. Lathrop, Wisconsin Department of Natural  
25 Resources); after 1995, ice thickness and snow depth were sampled once or twice every  
26 winter by the NTL-LTER Program (<https://portal.lternet.edu/nis/home.jsp#>). In addition,  
27 during winters of 2008–2009 and 2009–2010, blue ice, snow ice, total ice (blue ice + snow  
28 ice), and snow cover depth were measured weekly at multiple locations on the lake (Hsieh,  
29 2012). In total, there are 251 measurements of total ice, 21 for blue ice, 21 for snow ice, and  
30 49 for snow depth during 1911 to 2014.

31 Long-term water temperature records were obtained from Robertson (1989) and the NTL-  
32 LTER dataset (<https://portal.lternet.edu/nis/home.jsp#>). The frequency of water temperature

1 data varied widely from only one or two profiles per year to several profiles for a given day,  
2 while there were no data collected in some years between 1931 and 1970. The vertical  
3 resolution of the water profiles varied from 0.5 m to 2 m and sometimes 5 m when the water  
4 column was weakly stratified.

5

## 6 **4 Results**

### 7 **4.1 Shifts in air temperature, wind speed, and water clarity**

8 Annual air temperature (Fig. 1a) had a relatively small increase from 1910 until 1980, but has  
9 increased dramatically since 1981. Based on a piecewise linear regression algorithm, there  
10 was a small warming trend of  $0.081^{\circ}\text{C}$  per decade during 1911–1980, followed by a dramatic  
11 change (a warming trend of  $.334^{\circ}\text{C}$  per decade) from 1981–2014. Figure 1b shows that mean  
12 annual wind speed was  $4.44\text{ m s}^{-1}$  until 1994, when a significant shift occurred to  $3.74\text{ m s}^{-1}$   
13 (15% reduction) based on the sequential t-test STARS method (Rodionov, 2004). Figure 1c  
14 shows Secchi depth for Lake Mendota; however, no statistical trend was obtained due to the  
15 incompleteness of the data.

16 Combining the statistically significant breakpoint in air temperature trend that occurred in  
17 1981 and the shift in wind speed in 1994, the Madison climate may be broken into three  
18 different periods. The first, from 1911–1980, was a relatively cool period and had an average  
19 wind speed of  $4.44\text{ m s}^{-1}$ . The second period (1981–1993) occurred after the breakpoint in the  
20 air temperature trend and had a warmer air temperature and a wind speed of  $4.44\text{ m s}^{-1}$ . The  
21 third period (1994–2014) occurred after the shift in wind speed from  $4.44\text{ m s}^{-1}$  to  $3.74\text{ m s}^{-1}$   
22 and had even warmer air temperatures.

### 23 **4.2 Model validation and long-term simulations**

24 Here, we provide results of model validity comparisons followed by results of long-term  
25 changes in both observed (where available) and simulated conditions for: snow and ice  
26 thickness, ice-on and ice-off dates, lake water temperature, summer stratification, and  
27 thermocline depth.

## 1 4.2.1 Ice and snow thickness

2 Figure 2 shows the comparison of the long-term (from 1911 to 2014) simulation and  
3 measured data for blue ice, white ice, and total ice thickness and snow depth. Mean absolute  
4 differences between simulated and measured thickness of total ice, blue ice, snow ice, and  
5 snow cover are 7.8 cm (n=251; RMSE=7.9 cm), 5.5 cm (n=21; RMSE=3.3 cm), 1.9 cm  
6 (n=21; RMSE= 2.3 cm), 4.1 cm (n=49; RMSE= 3.7 cm), respectively. Some discrepancy  
7 between the model results and measurements may be due to the 1-D structure of the model.  
8 The DYRESM-WQ-I model provides only the lakewide average ice and snow depths, hence  
9 no horizontal variation. For a medium-to-large lake, such as Lake Mendota, spatial variations  
10 in ice and snow depths should be expected (Bengtsson, 1986). In the winters of 2008–2009  
11 and 2009–2010, ice measurements were made at multiple locations on Lake Mendota (Hsieh,  
12 2012). Data in 2008–2009 showed variations in ice thickness. Total ice thickness in the  
13 middle of the lake was approximately 12 cm greater than that at a littoral location (water  
14 depth=2 m) in late winter. In 2009–2010, ice cover was fairly spatially uniform through the  
15 entire sampling period. Consequently, discrepancy between model results and measurements  
16 is expected in those years when ice thickness varied spatially. The accuracy of predictions  
17 from DYRESM-WQ-I was compared with other models: MINLAKE (Fang and Stefan,  
18 1996b) produced standard errors of 11 cm for total ice thickness and 6 cm for snow cover for  
19 Thrush Lake, Minnesota, and 12 cm for total ice and 7 cm for snow cover for the north basin  
20 of Little Rock Lake, Wisconsin. Other models including LIMNOS (Vavrus et al., 1996) on  
21 Lake Mendota, Wisconsin; MLI (Rogers et al., 1995) on Harmon Lake, British Columbia; and  
22 CLIMo (Duguay et al., 2003) on lakes in Barrow, Alaska; Poker Flat, Alaska; and Churchill,  
23 Manitoba produced similar discrepancies to Lake Mendota between modeled and observed  
24 ice thickness and snow cover. In general DYRESM-WQ-I predicts the ice and snow depths  
25 fairly accurately. Figure 3a shows the evolution of simulated ice and snow thickness with  
26 multiple ice and snow thickness measurements taken during the winter of 2009-2010. Once  
27 ice develops, water beneath the ice continues to freeze, adding to the ice thickness, as heat is  
28 conducted from water to the air. In this winter period, lake ice grew fast initially and then  
29 slowed substantially. Eventually, the ice reaches its maximum thickness and stops growing  
30 (Ashton, 1986). Once air temperatures begin to warm up, ice quickly thins until ice out.  
31 Overall, the model is able to capture the growing ice cover as well as the temporally variable  
32 snow cover found on the lake.

1 Figure 3b shows the long-term (1911–2014) simulated annual maximum ice thickness during  
2 each winter. The annual maximum thickness varied widely from 20.1 cm (1997–1998) to 72.0  
3 cm (1911–1912) during the 1911–2014 period. The timing when ice reached its maximum  
4 thickness also varied considerably, from 17 January (1973) to 7 April (1923). In 73 out of 103  
5 winters, ice reached its maximum thickness in March. Linear regression analysis on simulated  
6 **annual** maximum ice thicknesses indicates that it has decreased at a rate of 12.7 cm per  
7 century during 1911–2014. **These results are much smaller than those for European lakes of**  
8 **similar latitudes (Choiński et al., 2010, 2013; Marszelewski and Skowron, 2006; Skowron,**  
9 **2009), with changes ranges from 0.20 to 0.60 cm yr<sup>-1</sup>, almost double that of Lake Mendota if**  
10 **the current change per year is extended to change per century.** A t-test of the mean values  
11 shows a statistically significant ( $p < 0.05$ ) difference in the mean annual maximum ice  
12 thickness between period 1 (1911–1980) and period 3 (1994–2014). Period 2 was not  
13 statistically different from either of the other two periods (Table 2).

#### 14 4.2.2 Ice-on and ice-off dates

15 Figure 4 shows measured and simulated ice-on date, ice-off date, and ice duration on the lake.  
16 The measured ice-on date is defined as the first day when the lake becomes fully ice-covered,  
17 and the ice-off date is the last day of the ice breakup before the open water season. Simulated  
18 results and observations are in good agreement, with a mean absolute difference of 2.3 days  
19 (RMSE = 2.4 days) for ice-on date and 5.7 days (RMSE = 4.8 days) for ice-off date. It is noted  
20 that both the mean error and RMSE are much smaller than the interannual variability in the  
21 observed ice-on dates (standard deviation SD = 11.2 days) and ice-off dates (SD = 10.6 days).  
22 Interannual variations in ice cover on Lake Mendota were large in the past century. Observed  
23 ice-on dates ranged from 3 December (1929) to 30 January (1931): a range of 58 days. Ice-off  
24 dates ranged from 27 February (1998) to 20 April (1923): a range of 51 days. The model  
25 successfully captures the interannual variations of ice-on and ice-off dates. For example, it  
26 reproduces the unusual late ice-on date in 1930–1931, and several noticeable early ice  
27 breakups associated with intense El Niño -Southern Oscillation (ENSO) events, i.e., 1965,  
28 1972, 1982, and 1997 (Anderson et al., 1996; Magnuson et al., 2000; Robertson et al., 2002)  
29 Figure 4b shows the ice duration, defined as the period between ice-on and ice-off dates. The  
30 mean absolute difference in ice duration between the model results and observations is 6.6  
31 days (RMSE = 6.1 days), compared to the observed SD of 17.9 days. Overall, we consider  
32 the model performs well in simulating ice on and off dates and ice cover duration.

1 Long-term trends in ice formation are examined by applying linear regression to the model  
2 results and observed data. Figure 4 clearly shows progressively later freezing, earlier breakup,  
3 and shorter duration in Lake Mendota from 1911 to 2014. Based on model results, ice-on  
4 dates became later by 9.0 days **per century**, ice-off dates became earlier by 12.3 days **per**  
5 **century**, and ice duration shortened by 21.3 days **per century**. Model results are in good  
6 agreement with those obtained from the observed data (7.4 days later ice-on dates, 9.3 days  
7 earlier for ice-off dates, and 18.0 days shorter duration **per century**). All linear trends from the  
8 observed and simulated data are statistically significant ( $p < 0.05$ ). **Similar tendencies have**  
9 **been observed at other lakes, which show decreasing ice cover duration from later ice on**  
10 **dates and earlier ice off dates (Choiński et al., 2010, 2013; Marszelewski and Skowron, 2006;**  
11 **Skowron, 2009). However, lakes in near the Great Lakes, North America and Poland have**  
12 **shown larger rates of change over periods of less than a century. For example, Jensen et al.**  
13 **(2007) observed average ice duration decreases of 5.3 days decade<sup>-1</sup> from 1975-2004 in the**  
14 **Great Lakes Region, and Polish lakes had observed changes as large as 0.8 to 0.9 days year<sup>-1</sup>**  
15 **for the peirod 1961-2000 (Marszelewski and Skowron, 2006) and 0.5 to 0.6 days year<sup>-1</sup> from**  
16 **1956-2005 (Skowron, 2009). Mean values of ice-on, ice-off, and ice duration for the three**  
17 selected periods, i.e., 1911–1980, 1981–1993, and 1994–2010, (see **Table 2** and Fig. 4) show  
18 a statistically significant ( $p < 0.05$ , based upon t-test) difference between period 1 (1911–1980)  
19 and period 3 (1994–2014) for all ice cover variables and a statistically significant ( $p < 0.05$ )  
20 difference between period 1 and period 2 (1981–1993) for ice cover duration.

### 21 4.2.3 Water temperature

22 The performance of the model in simulating water temperatures in the lake is presented in  
23 Figures 5 and 6. For temperatures at the near-surface, we use the simulated volume-weighted  
24 mean water temperatures between depths of 0 and 10m. The simulated epilimnetic  
25 temperatures compare well with those estimated from the measured data; the annual mean  
26 absolute error is 0.69 °C (n=3,239; RMSE=0.30 °C), demonstrating the ability of the model to  
27 simulate the heat budget in the upper mixed layer of the lake. Near-surface temperatures range  
28 from about 0 °C in winter to 26.1 °C in summer, and strongly respond to the net surface heat  
29 flux, as illustrated by the 2–3 °C variations that occur in both simulated and measured data,  
30 e.g. in the summer of 1921, 1960, 1994, and 2009 (Fig. 5). Overall the model captures  
31 interannual variations in epilimnetic temperatures even during extreme years; for example, the  
32 relatively high maximum epilimnetic temperatures (> 25 °C) in the summers of 1949, 1955,

1 1963, 1987, 1988, and 1999, and relatively cold annual maximum epilimnetic temperatures (~  
2 22 °C) in the summers of 1915, 1924, and 1942.

3 Figure 6 shows the comparison between the simulated volume-weighted near-bottom (within  
4 the hypolimnion) temperatures over the depths between 20–25 m and those estimated from  
5 the measured data. The mean absolute error is 1.04 °C (n=3,239; RMSE=0.53 °C). Near-  
6 bottom temperatures range from 0.2°C in winter to 19.1°C in autumn, which is approximately  
7 10 °C less than the variation in near-surface temperatures. Near-bottom temperatures are  
8 lowest when the lake first freezes, and then slowly increase because of heat released from the  
9 bottom sediment. **However**, we cannot discount that cold inflows could also penetrate into the  
10 lake and affect temperature at the selected depths (20-25 m). After ice break-up and just prior  
11 to seasonal stratification, temperature in near-bottom waters is usually identical to surface  
12 waters and the whole water column undergoes a period of sustained increase in temperature.  
13 Hypolimnetic temperatures then stay relatively constant during the stratified period with  
14 limited heat exchange associated with strong temperature gradients across the thermocline.

15 To further examine the model's capability of simulating the extreme differences in  
16 temperature, we compare measured and modeled temperatures under years with cold (1924)  
17 and warm (1963) epilimnion temperatures and cold (1972) and warm (1926) hypolimnion  
18 temperatures. Figure 7 shows that the model accurately captures the extreme conditions in  
19 those four years. For plotting, measurement values are assumed to remain constant for the  
20 duration of time between measurements. Measurements are generally taken at 1 m intervals  
21 over the depth of the water column, but in instances with irregular measurement intervals,  
22 temperatures are interpolated at intervals of 1 m for the depth of the lake. Slight variation in  
23 temperatures at each depth may be attributed to differences between the averaged seasonal  
24 Secchi depth values used to drive the model and the observed Secchi depth values. To  
25 demonstrate the model's ability to simulate changes in ice conditions and water temperature  
26 under the ice, measured and simulated conditions for these extreme years are presented in Fig.  
27 8. In this figure, the time frame and temperature scales are adjusted to highlight the subtle  
28 changes in winter and ice conditions and modeled ice and snow thickness are added to the top  
29 of the plots. While some discrepancies in temperature are recognized in the model  
30 comparison, the model generally captures the inverse stratification under the ice cover.  
31 Updated measurements of sediment temperature during winter may provide a better estimate  
32 of the sediment heat flux during ice-cover conditions, and improve under-ice temperature



1 predictions. Overall, the model can reliably simulate water temperature in open water and ice  
2 seasons for extreme cold and warm years.

3 Mid-summer (averaged between 16 July and 15 August when the thermocline was well-  
4 established) epilimnetic (0–10m) and hypolimnetic (20–25m) simulated temperatures from  
5 1911 to 2014 are shown in Fig. 9a. Epilimnetic temperatures range from 19.7 °C to 24.8 °C.  
6 There is no statistically significant temporal trend in the mid-summer epilimnetic  
7 temperatures, which may be partly explained by the lack of a warming trend for the mid-  
8 summer air temperature in the Madison area based on the measured meteorological data  
9 (Kucharik et al. 2010). In contrast, hypolimnetic temperatures range from 7.8 °C to 16.2 °C.  
10 The interannual variation in hypolimnetic temperatures ( $SD = 1.74^{\circ}C$ ) is greater than that in  
11 epilimnetic temperatures ( $SD = 1.0^{\circ}C$ ). Simulated hypolimnetic temperatures show a  
12 decreasing trend of  $-1.4^{\circ}C$  per century ( $p < 0.05$ ). Figure 9b shows that the decreased  
13 hypolimnetic temperatures resulted in the epilimnion-hypolimnion temperature difference  
14 increasing by  $2.0^{\circ}C$  per century ( $p < 0.05$ ). Mid-summer hypolimnetic temperature and  
15 epilimnion (0-10 m)-hypolimnion (20-25 m) temperature difference both exhibit significant  
16 ( $p < 0.05$ ) mean differences between period 1 (1911–1980) and period 3 (1994–2014), as  
17 shown in [Table 2](#).

18 Figure 10 shows the simulated long-term (104-year) mean under-ice water temperature  
19 (volume-weighted average of all depths) ranging from 0.78 °C to 3.07 °C (mean = 1.74 °C;  
20  $SD = 0.54^{\circ}C$ ). Based on model results, under-ice temperatures reveal a significant increasing  
21 trend ( $p < 0.05$ ) of  $0.48^{\circ}C$  per century during 1911–2014, suggesting that air temperature and  
22 wind speed may affect under-ice water temperature. For the selected regimes, the under-ice  
23 (bold lines) and freeze-over (dashed lines; volume-weighted average of all depths) water  
24 temperatures exhibit interesting features. The difference between the water temperature over  
25 the entire ice-covered period and the freeze-over water temperature has decreased through  
26 time, indicating less heat gain during the winter, which may relate to a shorter time to transfer  
27 heat and a smaller gradient in temperatures between the lake and the bottom sediments. The  
28 under-water ice temperatures and freeze-over water temperatures both show significant  
29 ( $p < 0.05$ ) differences between regime 1 (1911-1981) and regime 3 (1994-2014), as shown in  
30 [Table 2](#).

#### 1 4.2.4 Summer stratification period and thermocline depth

2 We characterize summer stratification by the dates of the onset of stratification and fall  
3 turnover, and the total duration of stratification. Accurately describing these conditions  
4 requires high frequency observations, which is challenging for long-term datasets. As a result,  
5 we used modeled data to determine these variables. The dates of stratification onset/fall  
6 turnover are defined as the day when the surface-to-bottom temperature difference is  
7 greater/less than 2 °C (Robertson and Ragotzkie, 1990). Figure 11 shows the dates of onset of  
8 stratification breakdown (fall turnover), and the total duration of stratification. The onset dates  
9 varied between 17 April (1977) and 30 June (1981), and the date of fall turnover varied from  
10 02 August (1965) to 19 October (2013). Over a century (1911–2014), the onset of thermal  
11 stratification has become earlier by 12.3 days ( $p<0.05$ ), and fall turnover has become later by  
12 14.6 days ( $p<0.05$ ), resulting in the stratification period increasing by 26.8 days ( $p<0.05$ ).  
13 Stratification onset date shows no significant difference among the three regimes (see Table  
14 2); however, fall turnover date is significantly ( $p<0.05$ ) different between periods 2 and 3 and  
15 between period 1 and 3, and the duration of stratification is significantly ( $p<0.05$ ) different  
16 between periods 1 and 3, as shown in Table 2.

17 The thermocline depth, defined as the depth of maximum temperature gradient, is determined  
18 from the model results (not shown in figure for brevity). During 1911–2014, the mid-summer  
19 thermocline depth in Lake Mendota varied from 8.3 m to 12.4 m (mean = 10.7 m; SD = 0.84  
20 m) with no significant long-term change.

21

## 22 5 Discussion

### 23 5.1 Significance of lake drivers

24 Changes in long-term simulated ice cover and thermal variables in Lake Mendota from  
25 1911–2014 appear to occur over short time frames within this period, synchronous with rapid  
26 changes in measured drivers (i.e., air temperature, wind speed, and water clarity). The  
27 variables examined included ice on/off dates, maximum ice thickness, freeze-over water  
28 temperature, mid-summer epilimnetic and hypolimnetic temperatures, summer hypolimnetic  
29 heating, and dates of stratification onset and fall turnover. To identify the relationship  
30 between the drivers and each of these variables, we employed Pearson correlation analysis on  
31 the detrended driver and simulation data. While using this method does not allow us to

1 directly determine causality, we may identify possible related drivers to changes in lake  
2 variables and the relative importance of relationship of three drivers (i.e. air temperature,  
3 wind speed, and water clarity) to the lake variables. To calculate correlation coefficients, each  
4 lake driver was averaged over a fixed period (e.g. April-May or November-December) and  
5 then paired with each of the simulated lake variables from the same period. The averaging  
6 period for air temperature and wind speed was chosen based on the fixed period that yielded  
7 the best correlation. We chose to employ fixed periods because thorough testing indicated that  
8 using a dynamic period introduced seasonal meteorological variations into the analysis. For  
9 instance, the correlation coefficient between onset date and the mean air temperature averaged  
10 over the prior month is expected to be high simply due to the seasonal variations over the  
11 course of the year, i.e., the later in the spring, the warmer air temperature. Seasonal Secchi  
12 depths were compiled for six seasonal periods: winter, spring turnover, early stratification,  
13 summer, destratification, and fall turnover (Lathrop et al., 1996), and the period closest to the  
14 averaging period used for air temperature and wind speed was used for correlation analysis.  
15 The averaging periods used for calculating correlation coefficients of each pair of variables  
16 are listed in Table 3. We discuss below the correlations for each pair of variables, shown in  
17 Figure 12.

### 18 5.1.1 Ice cover variables

19 Ice-on and ice-off dates have been shown to be sensitive to climate conditions (Livingstone,  
20 1997; Magnuson et al., 2000; Robertson et al., 1992). For both air temperature and wind  
21 speed, the averages from 1 November to 31 December (N-D) give the highest correlation  
22 with ice-on date; in agreement with the results of Assel and Robertson (1995) and similar to  
23 Gao and Stefan (1999). Averaged air temperature and wind speed over the period from 1  
24 February to 31 March (FM) provide the highest correlation with ice-off date, consistent with  
25 the study by Gao and Stefan (1999), who found that ice-off dates for ten Minnesota lakes  
26 correlated significantly with February to April air temperatures. The strong positive  
27 correlation ( $r = 0.82$ ) between ice-on date and N-D air temperature indicates a relationship  
28 between warmer N-D air temperatures and later freezing dates. Strong negative correlation  
29 between ice-off date and F-M air temperature ( $r = -0.70$ ) indicates a relationship between  
30 earlier ice breakup and warmer F-M air temperatures. In contrast to air temperature, ice cover  
31 is only weakly related to the seasonal average wind speed. Nevertheless the correlation  
32 between ice-on date and wind speed ( $r = -0.26$ ) is significant, indicating a relationship

1 between decreasing wind speed and earlier ice-on. Since large wind events prevent ice  
2 formation by breaking up skim ice, decreased wind speeds allow ice cover to form slightly  
3 earlier in the year. In the Madison area, the decreasing wind speeds may act to slightly  
4 mitigate the effects of increasing air temperature in later ice freezing. Correlation between ice  
5 dates and Secchi depths is low ( $r = 0.24$  for ice on and  $r = -0.22$  for ice off), indicating that  
6 water clarity has only a minor relationship with ice dates, in agreement with the simulation  
7 results of Fang and Stefan (1997). For both ice-on and ice-off dates, correlations with wind  
8 speed and Secchi depth are much less significant than with air temperature, indicating that air  
9 temperature has a more significant relationship with ice-on and ice-off dates and may be a  
10 more significant indicator of ice cover dates and ultimately ice cover duration.

11 Annual maximum ice thickness is negatively correlated with the 1 January – 31 March (J-F-  
12 M) averaged air temperature ( $r = -0.77$ ) and weakly correlated with J-F-M wind speed ( $r =$   
13  $0.21$ ), indicating a better relationship between annual maximum ice thickness and air  
14 temperature than for wind speed. The relationship of air temperatures on ice phenology is  
15 consistent with previous findings for lakes in Northern Wisconsin, Canada, and Maine (Gao  
16 and Stefan, 2004).

17 The strong correlations between air temperature and ice cover variables agree with several  
18 earlier studies (Anderson et al., 1996; Gao and Stefan, 2004; Livingstone, 1997; Vavrus et al.,  
19 1996; Williams et al., 2004). Snowfall has also been shown to be related to ice-off date  
20 (Jensen et al., 2007) and ice thickness (Duguay et al., 2003; Vavrus et al., 1996) because  
21 snowfall changes surface albedo and isolates ice cover from the atmosphere. We found  
22 simulated number of snow days (number of days when the lake has snow cover) is strongly  
23 correlated with ice-off date ( $r = 0.70$ ) and maximum ice thickness ( $r = 0.75$ ), indicating  
24 snowfall is also significantly related to ice cover.

### 25 5.1.2 Water temperature and stratification

26 Figure 10 shows that the simulated water temperatures in Lake Mendota at the time of  
27 freezing have been increasing since 1911. The correlation between freeze-over water  
28 temperature and lake drivers during 1 November and 31 December (N-D) is significant but  
29 with low  $r$  values for wind speed ( $r = -0.37$ ) and air temperature ( $r = -0.24$ ) and insignificant  
30 for Secchi depth ( $r = 0.18$ ). This result indicates that wind mixing is related to cooling of the  
31 water column before Lake Mendota freezes.

1 The simulated onset dates of stratification are negatively correlated with April-May (A-M) air  
2 temperature ( $r = -0.55$ ) and positively correlated with A-M wind speed ( $r = 0.35$ ). In Lake  
3 Mendota, the combination of increasing air temperatures and decreasing wind speeds are both  
4 related to earlier onset of stratification. Austin and Colman (2007) suggested that the  
5 declining ice cover combined with higher air temperatures cause the earlier onset of  
6 stratification in Lake Superior at a rate of  $0.5 \text{ day yr}^{-1}$ . However, no correlation between ice-  
7 off date and the onset of stratification was found for Lake Mendota in this study.

8 Mid-summer (16 July – 15 August) epilimnetic temperatures are most strongly correlated  
9 with the air temperature averaged over the corresponding period. Epilimnetic temperature is  
10 highly correlated with air temperature ( $r = 0.77$ ) and not significantly correlated with wind  
11 speed averaged over the corresponding period ( $r = -0.11$ ) and Secchi depth ( $r = 0.09$ ). Mid-  
12 summer hypolimnetic temperatures depend on the timing of stratification (how long the near-  
13 bottom water is heated before the onset of stratification) and the amount of heat mixed into  
14 hypolimnion before and during the stratification period. Hypolimnetic temperatures are  
15 weakly correlated with air temperatures ( $r = -0.23$ ) and not significantly correlated with wind  
16 speed ( $r = 0.11$ ) and Secchi depth ( $r = -0.02$ ). Summer hypolimnetic heating (temperature  
17 change between 1 July and 31 August, J-A) is most strongly correlated with J-A wind speed  
18 ( $r = 0.49$ ), moderately correlated with Secchi depth averaged over 30 June – 2 September ( $r =$   
19  $0.35$ ), and not significantly correlated with J-A air temperature ( $r = -0.02$ ). This indicates a  
20 relationship between stronger winds and clearer water and deeper heat mixing.

21 Fall turnover occurs when the lake water cools, driven largely by colder air temperature and  
22 wind-induced mixing. The date of fall turnover is significantly negatively correlated with  
23 September wind speed ( $r = -0.43$ ) so that higher wind speed is related to earlier fall turnover.  
24 Air temperature ( $r = 0.11$ ) and Secchi depth ( $r = -0.15$ ) are not significantly correlated with  
25 the timing of fall mixing. Interestingly, the mid-summer epilimnion-hypolimnion temperature  
26 difference has a higher correlation with turnover date ( $r = 0.62$ ) than any of the three lake  
27 drivers. This finding suggests that the influences of spring conditions may be transmitted to  
28 the following summer and fall seasons. In other words, the cooler hypolimnion and the greater  
29 epilimnion-hypolimnion temperature difference after a warmer and less windy spring may be  
30 related to later fall turnover and a longer stratification period.

## 1    **5.2           Abrupt changes in lake variables**

2    To investigate the effects of abrupt changes in air temperature and wind speed on lake ice  
3    cover and water temperatures, we used the hydrodynamic model DYRESM-WQ-I to describe  
4    changes in several lake variables during 1911–2014. Simulation results were used to examine  
5    differences in mean values of these lake variables between specific periods (see Sect. 4.1).  
6    For each period of the selected periods, mean lake variables were calculated and the  
7    differences between periods were analyzed with t-tests to determine if they were significantly  
8    different. **Table 2** lists the mean values and differences for the nine lake variables during the  
9    three selected periods. Comparison of period 1 (1911-1980) to period 2 (1981-1993) of lake  
10   variables shows a shift to warmer air temperature; period 2 to period 3 (1994-2014) represents  
11   an abrupt change to lower wind speed; and period 1 to period 3 represents a shift to warmer  
12   air temperature combined with an abrupt change to lower wind speeds.

### 13   **5.2.1 Ice cover**

14   Three simulated ice cover variables (maximum ice thickness, ice-on date, and ice-off date)  
15   show no significant difference in means between period 1 and 2. In other words, the abrupt  
16   change in air temperature trend does not result in a different ice regime even though the ice  
17   cover variables are all highly correlated with air temperature ( $r > 0.70$ ). This may be because  
18   the change in air temperatures was not of sufficient magnitude to cause a particularly large  
19   change in ice cover or it may signify that other drivers are contributing to changes in ice cover  
20   variables. Additionally, no significant difference is observed between period 2 and period 3  
21   for the ice cover variables since the wind speed and ice cover variables are only weakly  
22   correlated. The ice variables do show a statistically significant difference in mean values  
23   between periods 1 and 3, indicating that a significant shift in these variables occurs only after  
24   a sufficiently large increase in air temperature and an abrupt shift in wind speed within the  
25   time between periods 1 and 3. In other words, air temperature need to increase sufficiently to  
26   observe a statistically significant difference in ice cover. Ice cover duration, however, shows a  
27   significant difference in the mean between all **periods** (1–2, 2–3, and 1–3), indicating that  
28   distinct differences in ice cover duration can be affected by both trends in air temperature  
29   (i.e., there was a large enough change in air temperature between each period) and an abrupt  
30   shift in the wind speed. The combined effects of slightly later ice-on dates and earlier ice-off  
31   dates during each of the three periods resulted in statistically significant difference in mean  
32   ice cover duration values between each of the three periods.

1 Analysis of simulated maximum ice thickness, ice-on, ice-off, and ice cover duration using  
2 the method of Rodionov (2004) shows that the most statistically significant timing of the shift  
3 in these ice cover variables occurs in the winter of 1997-1998, but a major shift in the air  
4 temperature or wind speed data was not observed at that time. The unusual winter of 1997-  
5 1998 strongly drove the statistically significant difference in mean values between periods 1  
6 and 3 rather than the abrupt shift in wind speed in 1994. Interestingly, similar results have  
7 been reported in Lake Superior, where statistically significant step changes were found in  
8 winter ice duration and maximum wintertime ice extent; these step changes account for most  
9 of the long-term trends in ice cover for the lake (Van Cleave et al., 2014). The timing of this  
10 **step change** may be attributed to a combination of the longer term changes in meteorological  
11 conditions and the short-term annual change occurring in the warm El Niño winter of 1997-  
12 1998 (Van Cleave et al., 2014). Mueller et al. (2009) found that a similar climate shift  
13 between 1997 and 1998 initiated a change in lake ice phenology from infrequent to frequent  
14 summer loss in several high-Arctic lakes. **Similarly, lakes in Poland show a considerable**  
15 **statistical relationship between ice cover and the North Atlantic Oscillation winter indexes**  
16 **(Skowron, 2009), indicating that ice cover may be driven by other large oscillations as well.**

## 17 5.2.2 Water temperature and stratification

18 Means of five simulated lake variables (under-ice water temperature, freeze-over water  
19 temperature, epilimnion-hypolimnion temperature difference [indicative of strength of  
20 stratification], and duration of stratification) over the three periods have significant ( $p < 0.05$ )  
21 differences only between period 1 and period 3. This change likely occurs because of the  
22 combined effects of large changes in air temperature and a change in wind speed. Both air  
23 temperature and wind speed are significantly correlated with these five lake variables. Each  
24 driver alone may not be strong enough to cause a major shift in the lake variables, but their  
25 combined effects may reinforce the drivers of abrupt change in ice and thermal phenology.  
26 Further work is required to examine how the major drivers may either reinforce or dampen  
27 lake ice and temperature responses, particularly in relation to directional shifts predicted  
28 under climate change.

29 Fall turnover date, highly correlated with wind speed, exhibits a significant ( $p < 0.05$ ) shift in  
30 the mean value in 1994, corresponding with the abrupt shift in the wind speed. Interestingly,  
31 hypolimnetic water temperatures, which are not significantly correlated with wind speed, but  
32 are correlated with air temperatures, also show a significant ( $p < 0.05$ ) shift in the mean value

1 in 1994. Hypolimnetic heating, significantly correlated with wind speed ( $r = 0.49$ ), does not  
2 exhibit a significant breakpoint, nor are any of the mean differences among the three periods  
3 significant. Given the high correlation between wind speed and hypolimnetic heating, it is  
4 hypothesized that there should be a shift in hypolimnetic heating caused by the abrupt shift in  
5 wind speed in 1994. The lack of statistically significant step change may be explained by the  
6 simultaneous high correlation between Secchi depth and hypolimnetic heating ( $r = 0.35$ ),  
7 indicating that water clarity may act to inhibit heating regardless of changes in wind speed, or  
8 it may be acting to filter or mitigate the effects of the wind speed shift. Finally, mean onset  
9 date of stratification and mid-summer epilimnetic temperature exhibit no difference among  
10 the three periods. This may be due to two processes: (i) the climate signal is being filtered out  
11 by the lake; or (ii) the external perturbation of the system is not yet strong enough to trigger a  
12 major shift in the system's internal dynamics.

### 13 **5.3 Ecological significance of long-term changes in lake variables**

14 Changes in lake ice cover and thermal structure are of great ecological significance. Summer  
15 stratification inhibits the vertical transport of oxygen and nutrients. The vertical temperature  
16 gradient in Lake Mendota increased (Fig. 9b), which should decrease the depth of vertical  
17 mixing and oxygen penetration and decrease the transport of nutrients from the hypolimnion  
18 to the epilimnion (Fee et al., 1994). Thus, increases in air temperature may increase the  
19 epilimnetic-hypolimnetic temperature gradient and decrease the extent of summer algal  
20 blooms in the Lake Mendota where internal loading of phosphorus has been shown to be  
21 significant to its summer phosphorus budget (Lathrop et al., 1998; Soranno et al., 1997).  
22 Additionally, phosphorus entrainment predominately occurs during periods of high wind  
23 (Kamarainen et al., 2009; Stauffer and Armstrong, 1986). Algal blooms have been associated  
24 with increases in epilimnetic phosphorus due to these high-wind episodes (Robarts et al.,  
25 1998; Soranno et al., 1997; Stauffer and Lee, 1973). Changes in the frequency of high wind  
26 episodic events may further impact the growth of algal blooms within Lake Mendota (Kara et  
27 al., 2012). Elevated water temperatures can affect plankton community composition and  
28 abundance (Elliot et al., 2005; Findlay et al., 2001; Francis et al., 2014; Rice et al., 2015) and  
29 fish populations (Carpenter et al., 1992; De Stasio et al., 1996; Gunn, 2002; Magnuson et al.,  
30 1990). High water temperatures have been also shown to enhance the dominance of  
31 cyanobacteria (Huber et al., 2008; Jöhnk et al., 2008). Such changes in algal blooms,  
32 zooplankton populations, and fish populations may have drastic effects on the overall food-



1 web within Lake Mendota (Carpenter et al., 1998). Variations in ice-cover conditions have  
2 impacts on ecosystems by dramatically changing habitat factors such as light and temperature  
3 (Adrian et al., 1999; Quayle et al., 2002). Such changes impact the distribution, behavior,  
4 community composition, reproduction, and evolutionary adaptations of organisms (Sala et al.,  
5 2000). Previous studies have shown that climate change will likely affect the biodiversity of  
6 freshwater ecosystems (Heino et al., 2009; Mantyka-Pringle et al., 2014; Wrona et al., 2006).  
7 Climate change can bring asynchronies in biotic communities that may result in a  
8 phenological decoupling of trophic relationships (Stenseth and Mysterud, 2002).

9

## 10 **6 Conclusions**

11 The 1-D hydrodynamic-ice model, DYRESM-WQ-I, is developed and validated, then used to  
12 simulate the ice cover and thermal structure of Lake Mendota, WI from 1911–2014. The  
13 model reliably reproduces the interannual variations and long-term (104-year) changes in ice  
14 cover and thermal structure. To our knowledge, this study presents the first attempt to  
15 continuously model both ice cover and thermal structure of a lake over a period as long as a  
16 century. Simulated ice cover over this period has changed dramatically: freezing later (9.0  
17 days per century), breaking up earlier (12.3 days per century), resulting in shorter ice duration  
18 (21.3 days per century), and thinner maximum ice thickness (12.7 cm per century). These  
19 results agree well with the observed data and previous studies. For lake thermal structure,  
20 results of the continuous model simulation indicate an earlier onset of thermal stratification  
21 (12.3 days per century), later fall turnover (14.6 days per century), and a longer stratification  
22 period (26.8 days per century) during this period. In addition, simulated mid-summer  
23 hypolimnetic temperature decreased ( $-1.4^{\circ}\text{C}$  per century), causing mid-summer epilimnetic-  
24 hypolimnetic temperature differences (strength of stratification) to increase ( $2.0^{\circ}\text{C}$  per  
25 century). Interestingly, there is no significant trend in mid-summer epilimnetic temperatures.

26 Correlations comparing simulated lake conditions with seasonally averaged meteorological  
27 conditions indicate that, among the three drivers, air temperature has the largest relationship  
28 with the ice cover variables (ice-on and ice-off dates, and maximum ice thickness) and with  
29 three stratification variables (date of the onset of stratification, epilimnetic temperatures, and  
30 hypolimnetic temperatures). Freeze-over water temperature, summer hypolimnetic heating,  
31 and date of fall turnover all have the largest correlation with wind speed. Both air temperature  
32 and wind speeds are highly correlated with the onset of stratification. Secchi depth does not

1 appear to have a strong relationship with interannual variability of these variables for Lake  
2 Mendota, but in combination with wind speed may be related to hypolimnetic heating.

3 Changes in meteorological factors over the past 104 years were examined to determine if  
4 there have been abrupt shifts, rather than linear changes. Based on a change in the trend of air  
5 temperature increase occurring in 1981 and a major shift in wind speed in 1994, the Madison  
6 climate is divided into three distinct periods: 1911–1980, with relatively low air temperatures  
7 and mean wind speeds of  $4.44 \text{ m s}^{-1}$ ; 1981–1993, with higher air temperatures and mean wind  
8 speeds of  $4.44 \text{ m s}^{-1}$ ; and 1994–2014 with still higher air temperatures and mean wind speed  
9 of  $3.74 \text{ m s}^{-1}$ . Ice cover duration exhibited a significant difference in the mean among all three  
10 periods, while ice-on, ice-off, and maximum ice thickness only show a significant difference  
11 between period one and three, indicating that only with a large change in air temperature and  
12 an abrupt shift in wind speeds are change in the ice cover variables statistically different. Mid-  
13 summer hypolimnetic temperature and fall turnover date both reveal significant ( $p < 0.05$ )  
14 differences in the mean value in 1994, corresponding with the abrupt shift toward lower wind  
15 speeds. Some lake variables (under-ice water temperature, freeze-over water temperature,  
16 epilimnion-hypolimnion temperature difference, and stratification duration) may not be driven  
17 by either the change in air temperature trend or the abrupt shift in wind speed alone, but a  
18 shift in the mean of the lake variables does occur in 1994 when both the air temperatures are  
19 warmest and the wind speed experienced an abrupt shift. The exact timing of shifts may be  
20 difficult to define because of extreme changes in weather in specific years and it may mask  
21 the longer term changes in meteorological conditions (i.e. abrupt shifts).

22 Linear trends from the extensive data collection may be misleading as they masks these  
23 sudden shifts in the air temperature and wind speed drivers and lake ice cover and thermal  
24 structure variables. Examining the mean differences in lake variables in response to shifts in  
25 air temperature and abrupt shifts in wind speeds provide a better understanding of how the  
26 southern Wisconsin climate has changed and what impact those changes have on shifts in the  
27 ice cover and water temperature of dimictic Lake Mendota. It is shown that air temperature  
28 and wind speed changes have occurred in stages and lake variables have responded in a non-  
29 linear way to these changes.

30

31

32 **Acknowledgements**

1 Financial support for this project was provided in part by the U.S. National Science  
2 Foundation Long-Term Ecological Research Program, University of Wisconsin (UW) Water  
3 Resources Institutes USGS 104(B) Research Project, and UW Office of Sustainability SIRE  
4 Award Program. Funding support for the first author by the College of Engineering Grainger  
5 Wisconsin Distinguished Graduate Fellowship is acknowledged. We also thank Yi-Fang  
6 Hsieh **for** further developing an ice module in the DYRESM-WQ model in work that was  
7 initiated by Brett Wallace. Dr. Yi-Fang Hsieh also collected ice data for model calibration and  
8 validation. Finally, the authors would like to thank John Magnuson and Tim Kratz at the  
9 Center for Limnology for their insightful suggestions and valuable comments regarding  
10 climate change on lake ice.

11

## 1 **References**

- 2 Adrian, R., Walz, N., Hintze, T., Hoeg, S. and Rusche, R.: Effects of ice duration on plankton  
3 succession during spring in a shallow polymictic lake, *Freshw. Biol.*, 41(3), 621–634,  
4 doi:10.1046/j.1365-2427.1999.00411.x, 1999.
- 5 Anderson, W. L., Robertson, D. M. and Magnuson, J. J.: Evidence of recent warming and El  
6 Niño-related variations in ice breakup of Wisconsin lakes, *Limnol. Oceanogr.*, 41(5), 815–  
7 821, doi:10.4319/lo.1996.41.5.0815, 1996.
- 8 Antenucci, J. and Imerito, A.: The CWR dynamic reservoir simulation model DYRESM,  
9 Centre for Water Research: The University of Western Australia., 2003.
- 10 Arhonditsis, G. B., Brett, M. T., DeGasperi, C. L. and Schindler, D. E.: Effects of Climatic  
11 Variability on the Thermal Properties of Lake Washington, *Limnol. Oceanogr.*, 49(1), 256–  
12 270, 2004.
- 13 Ashton, G. D.: River and lake ice engineering, Water Resources Publications, Littleton  
14 Colorado., 1986.
- 15 Assel, R. A. and Robertson, D. M.: Changes in winter air temperatures near Lake Michigan,  
16 1851-1993, as determined from regional lake-ice records, *Limnol. Oceanogr.*, 40(1), 165–176,  
17 doi:10.4319/lo.1995.40.1.0165, 1995.
- 18 Austin, J. A. and Colman, S. M.: Lake Superior summer water temperatures are increasing  
19 more rapidly than regional air temperatures: A positive ice-albedo feedback, *Geophys. Res.*  
20 *Lett.*, 34(6), L06604, doi:10.1029/2006GL029021, 2007.
- 21 Bengtsson, L.: Spatial Variability of Lake Ice Covers, *Geogr. Ann. Ser. Phys. Geogr.*, 68(1/2),  
22 113–121, doi:10.2307/521182, 1986.
- 23 Birge, E. A., Juday, C. and March, H. W.: The temperature of the bottom deposits of Lake  
24 Mendota; a chapter in the heat exchanges of the lake, *Trans. Wis. Acad. Sci. Arts Lett.*, XXIII  
25 [online] Available from: [http://digioll.library.wisc.edu/cgi-bin/WI/WI-  
26 idx?type=article&did=WI.WT1927.EABaird&id=WI.WT1927&isize=M](http://digioll.library.wisc.edu/cgi-bin/WI/WI-idx?type=article&did=WI.WT1927.EABaird&id=WI.WT1927&isize=M) (Accessed 1  
27 October 2015), 1927.
- 28 Butcher, J. B., Nover, D., Johnson, T. E. and Clark, C. M.: Sensitivity of lake thermal and  
29 mixing dynamics to climate change, *Clim. Change*, 129(1-2), 295–305, doi:10.1007/s10584-  
30 015-1326-1, 2015.
- 31 Carpenter, S. R., Fisher, S. G., Grimm, N. B. and Kitchell, J. F.: Global change and  
32 freshwater ecosystems, *Annu. Rev. Ecol. Syst.*, 119–139, 1992.
- 33 Carpenter, S. R., Olson, M., Cunningham, P., Gafny, S., Nibbelink, N., Pellett, T., Storlie, C.,  
34 Trebitz, A. and Wilson, K.: Macrophyte Structure and Growth of Bluegill (*Lepomis  
35 macrochirus*): Design of a Multilake Experiment, in *The Structuring Role of Submerged  
36 Macrophytes in Lakes*, edited by E. Jeppesen, M. Søndergaard, M. Søndergaard, and K.  
37 Christoffersen, pp. 217–226, Springer New York. [online] Available from:

- 1 [http://link.springer.com/chapter/10.1007/978-1-4612-0695-8\\_11](http://link.springer.com/chapter/10.1007/978-1-4612-0695-8_11) (Accessed 1 October 2015),  
2 1998.
- 3 Choiński, A., Kolendowicz, L., Pociask-Karteczka, J. and Sobkowiak, L.: Changes in Lake  
4 Ice Cover on the Morskie Oko Lake in Poland (1971–2007), *Adv. Clim. Change Res.*, 1(2),  
5 71–75, doi:10.3724/SP.J.1248.2010.00071, 2010.
- 6 Choiński, A., Ptak, M. and Strzelczak: Areal variation in ice cover thickness on lake morskie  
7 oko (Tatra mountains), *Carpathian J. Earth Environ. Sci.*, 8(3), 97–102, 2013.
- 8 Desai, A. R., Austin, J. A., Bennington, V. and McKinley, G. A.: Stronger winds over a large  
9 lake in response to weakening air-to-lake temperature gradient, *Nat. Geosci.*, 2(12), 855–858,  
10 doi:10.1038/ngeo693, 2009.
- 11 De Stasio, B. T., Hill, D. K., Kleinhans, J. M., Nibbelink, N. P. and Magnuson, J. J.: Potential  
12 effects of global climate change on small north-temperate lakes: Physics, fish, and plankton,  
13 *Limnol. Oceanogr.*, 41(5), 1136–1149, doi:10.4319/lo.1996.41.5.1136, 1996.
- 14 Dobiesz, N. E. and Lester, N. P.: Changes in mid-summer water temperature and clarity  
15 across the Great Lakes between 1968 and 2002, *J. Gt. Lakes Res.*, 35(3), 371–384,  
16 doi:10.1016/j.jglr.2009.05.002, 2009.
- 17 Duguay, C. R., Flato, G. M., Jeffries, M. O., Ménard, P., Morris, K. and Rouse, W. R.: Ice-  
18 cover variability on shallow lakes at high latitudes: model simulations and observations,  
19 *Hydrol. Process.*, 17(17), 3465–3483, doi:10.1002/hyp.1394, 2003.
- 20 Elliot, A. J., Thackeray, S. J., Huntingford, C. and Jones, R. G.: Combining a regional climate  
21 model with a phytoplankton community model to predict future changes in phytoplankton in  
22 lakes, *Freshw. Biol.*, 50(8), 1404–1411, doi:10.1111/j.1365-2427.2005.01409.x, 2005.
- 23 Ellis, C. R., Stefan, H. G. and Gu, R.: Water Temperature Dynamics and Heat Transfer  
24 Beneath the Ice Cover of a Lake, *Limnol. Oceanogr.*, 36(2), 324–335, 1991.
- 25 Fang, X. and Stefan, H. G.: Dynamics of heat exchange between sediment and water in a lake,  
26 *Water Resour. Res.*, 32(6), 1719–1727, doi:10.1029/96WR00274, 1996a.
- 27 Fang, X. and Stefan, H. G.: Long-term lake water temperature and ice cover  
28 simulations/measurements, *Cold Reg. Sci. Technol.*, 24(3), 289–304, doi:10.1016/0165-  
29 232X(95)00019-8, 1996b.
- 30 Fang, X. and Stefan, H. G.: Simulated climate change effects on dissolved oxygen  
31 characteristics in ice-covered lakes, *Ecol. Model.*, 103(2–3), 209–229, doi:10.1016/S0304-  
32 3800(97)00086-0, 1997.
- 33 Fang, X. and Stefan, H. G.: Simulations of climate effects on water temperature, dissolved  
34 oxygen, and ice and snow covers in lakes of the contiguous U.S. under past and future climate  
35 scenarios, *Limnol. Oceanogr.*, 54(6part2), 2359–2370, doi:10.4319/lo.2009.54.6\_part\_2.2359,  
36 2009.

- 1 Fee, E. J., Hecky, R. E., Regehr, G. W., Hendzel, L. L. and Wilkinson, P.: Effects of Lake  
2 Size on Nutrient Availability in the Mixed Layer during Summer Stratification, *Can. J. Fish.*  
3 *Aquat. Sci.*, 51(12), 2756–2768, doi:10.1139/f94-276, 1994.
- 4 Fee, E. J., Hecky, R. E., Kasian, S. E. M. and Cruikshank, D. R.: Effects of lake size, water  
5 clarity, and climatic variability on mixing depths in Canadian Shield lakes, *Limnol.*  
6 *Oceanogr.*, 41(5), 912–920, doi:10.4319/lo.1996.41.5.0912, 1996.
- 7 Findlay, D. L., Kasian, S. E. M., Stainton, M. P., Beaty, K. and Lyng, M.: Climatic influences  
8 on algal populations of boreal forest lakes in the Experimental Lakes Area, *Limnol.*  
9 *Oceanogr.*, 46(7), 1784–1793, doi:10.4319/lo.2001.46.7.1784, 2001.
- 10 Francis, T. B., Wolkovich, E. M., Scheuerell, M. D., Katz, S. L., Holmes, E. E. and Hampton,  
11 S. E.: Shifting Regimes and Changing Interactions in the Lake Washington, U.S.A., *Plankton*  
12 *Community from 1962–1994*, *PLoS ONE*, 9(10), e110363,  
13 doi:10.1371/journal.pone.0110363, 2014.
- 14 Fu, G., Charles, S. P. and Yu, J.: A critical overview of pan evaporation trends over the last  
15 50 years, *Clim. Change*, 97(1-2), 193–214, doi:10.1007/s10584-009-9579-1, 2009.
- 16 Gao, S. and Stefan, H. G.: Multiple Linear Regression for Lake Ice and Lake Temperature  
17 Characteristics, *J. Cold Reg. Eng.*, 13(2), 59–77, doi:10.1061/(ASCE)0887-  
18 381X(1999)13:2(59), 1999.
- 19 Gao, S. and Stefan, H. G.: Potential Climate Change Effects on Ice Covers of Five Freshwater  
20 Lakes, *J. Hydrol. Eng.*, 9(3), 226–234, doi:10.1061/(ASCE)1084-0699(2004)9:3(226), 2004.
- 21 Gunn, J. M.: Impact of the 1998 El Niño event on a Lake Charr, *Salvelinus Namaycush*,  
22 *Population Recovering from Acidification*, *Environ. Biol. Fishes*, 64(1-3), 343–351,  
23 doi:10.1023/A:1016058606770, 2002.
- 24 Hamilton, D. P. and Schladow, S. G.: Prediction of water quality in lakes and reservoirs. Part  
25 I — Model description, *Ecol. Model.*, 96(1–3), 91–110, doi:10.1016/S0304-3800(96)00062-2,  
26 1997.
- 27 Hartmann, D. L., Klein Tank, A. M. G., Rusticucci, M., Alexander, L. V., Brönnimann, S.,  
28 Charabi, Y., Dentener, F. J., Dlugokencky, E. J., Easterling, D. R., Kaplan, A., Soden, B. J.,  
29 Thorne, P. W., Wild, M. and Zhai, P. M.: Climate change 2013: the physical science basis:  
30 Working Group I contribution to the Fifth assessment report of the Intergovernmental Panel  
31 on Climate Change, edited by T. Stocker, D. Qin, G.-K. Plattner, M. Tignor, S. K. Allen, J.  
32 Boschung, A. Nauels, Y. Xia, V. Bex, and P. M. Midgley, Cambridge University Press, New  
33 York., 2013.
- 34 Heino, J., Virkkala, R. and Toivonen, H.: Climate change and freshwater biodiversity:  
35 detected patterns, future trends and adaptations in northern regions, *Biol. Rev.*, 84(1), 39–54,  
36 doi:10.1111/j.1469-185X.2008.00060.x, 2009.
- 37 Hill, J. M. and Kucera, A.: Freezing a saturated liquid inside a sphere, *Int. J. Heat Mass*  
38 *Transf.*, 26(11), 1631–1637, doi:10.1016/S0017-9310(83)80083-0, 1983.

- 1 Hocking, G. C. and Straškraba, M.: The Effect of Light Extinction on Thermal Stratification  
2 in Reservoirs and Lakes, *Int. Rev. Hydrobiol.*, 84(6), 535–556, doi:10.1002/iroh.199900046,  
3 1999.
- 4 Hsieh, Y.: Modeling ice cover and water temperature of Lake Mendota, PhD Thesis,  
5 University of Wisconsin-Madison, Madison, Wisconsin, USA., 2012.
- 6 Huber, V., Adrian, R. and Gerten, D.: Phytoplankton response to climate warming modified  
7 by trophic state, *Limnol. Oceanogr.*, 53(1), 1–13, doi:10.4319/lo.2008.53.1.0001, 2008.
- 8 Imberger, J. and Patterson, J. C.: Dynamic reservoir simulation model - DYRESM: 5, in  
9 *Transport Models for Inland and Coastal Waters*, edited by H. B. Fischer, pp. 310–361,  
10 Academic Press., 1981.
- 11 IPCC: Summary for Policymakers, in *Climate Change 2013: The Physical Science Basis.*  
12 *Contribution of Working Group I to the Fifth Assessment Report of the Intergovernmental*  
13 *Panel on Climate Change*, edited by T. Stocker, D. Qin, G.-K. Plattner, M. Tignor, S. K.  
14 Allen, J. Boschung, A. Nauels, Y. Xia, V. Bex, and P. M. Midgley, Cambridge University  
15 Press, New York, NY, USA., 2013.
- 16 Jensen, O. P., Benson, B. J., Magnuson, J. J., Card, V. M., Futter, M. N., Soranno, P. A. and  
17 Stewart, K. M.: Spatial analysis of ice phenology trends across the Laurentian Great Lakes  
18 region during a recent warming period, *Limnol. Oceanogr.*, 52(5), 2013–2026,  
19 doi:10.4319/lo.2007.52.5.2013, 2007.
- 20 Jiang, Y., Luo, Y., Zhao, Z. and Tao, S.: Changes in wind speed over China during 1956–  
21 2004, *Theor. Appl. Climatol.*, 99(3-4), 421–430, doi:10.1007/s00704-009-0152-7, 2009.
- 22 Jöhnk, K. D., Huisman, J., Sharples, J., Sommeijer, B., Visser, P. M. and Stroom, J. M.:  
23 Summer heatwaves promote blooms of harmful cyanobacteria, *Glob. Change Biol.*, 14(3),  
24 495–512, doi:10.1111/j.1365-2486.2007.01510.x, 2008.
- 25 Kamarainen, A. M., Penczykowski, R. M., Van de Bogert, M. C., Hanson, P. C. and  
26 Carpenter, S. R.: Phosphorus sources and demand during summer in a eutrophic lake, *Aquat.*  
27 *Sci.*, 71(2), 214–227, doi:10.1007/s00027-009-9165-7, 2009.
- 28 Kara, E. L., Hanson, P., Hamilton, D., Hipsey, M. R., McMahon, K. D., Read, J. S., Winslow,  
29 L., Dedrick, J., Rose, K., Carey, C. C., Bertilsson, S., da Motta Marques, D., Beversdorf, L.,  
30 Miller, T., Wu, C., Hsieh, Y.-F., Gaiser, E. and Kratz, T.: Time-scale dependence in  
31 numerical simulations: Assessment of physical, chemical, and biological predictions in a  
32 stratified lake at temporal scales of hours to months, *Environ. Model. Softw.*, 35, 104–121,  
33 doi:10.1016/j.envsoft.2012.02.014, 2012.
- 34 King, J. R., Shuter, B. J. and Zimmerman, A. P.: The response of the thermal stratification of  
35 South Bay (Lake Huron) to climatic variability, *Can. J. Fish. Aquat. Sci.*, 54(8), 1873–1882,  
36 doi:10.1139/f97-093, 1997.
- 37 Kitchell, J. F.: *Food Web Management: A Case Study of Lake Mendota*, Springer Science &  
38 Business Media., 2012.

- 1 Klink, K.: Trends and Interannual Variability of Wind Speed Distributions in Minnesota, J.  
2 Clim., 15(22), 3311–3317, doi:10.1175/1520-0442(2002)015<3311:TAIVOW>2.0.CO;2,  
3 2002.
- 4 Lathrop, R. C., Carpenter, S. R. and Rudstam, L. G.: Water clarity in Lake Mendota since  
5 1900: responses to differing levels of nutrients and herbivory, Can. J. Fish. Aquat. Sci.,  
6 53(10), 2250–2261, doi:10.1139/f96-187, 1996.
- 7 Lathrop, R. C., Carpenter, S. R., Stow, C. A., Soranno, P. A. and Panuska, J. C.: Phosphorus  
8 loading reductions needed to control blue-green algal blooms in Lake Mendota, Can. J. Fish.  
9 Aquat. Sci., 55(5), 1169–1178, doi:10.1139/f97-317, 1998.
- 10 Liu, Y., Wu, G. and Zhao, X.: Recent declines in China's largest freshwater lake: trend or  
11 regime shift?, Environ. Res. Lett., 8(1), 014010, doi:10.1088/1748-9326/8/1/014010, 2013.
- 12 Livingstone, D. M.: Break-up Dates of Alpine Lakes As Proxy Data for Local and Regional  
13 Mean Surface Air Temperatures, Clim. Change, 37(2), 407–439,  
14 doi:10.1023/A:1005371925924, 1997.
- 15 Magnuson, J. J., Benson, B. J. and Kratz, T. K.: Temporal coherence in the limnology of a  
16 suite of lakes in Wisconsin, U.S.A., Freshw. Biol., 23(1), 145–159, doi:10.1111/j.1365-  
17 2427.1990.tb00259.x, 1990.
- 18 Magnuson, J. J., Webster, K. E., Assel, R. A., Bowser, C. J., Dillon, P. J., Eaton, J. G., Evans,  
19 H. E., Fee, E. J., Hall, R. I., Mortsch, L. R., Schindler, D. W. and Quinn, F. H.: Potential  
20 Effects of Climate Changes on Aquatic Systems: Laurentian Great Lakes and Precambrian  
21 Shield Region, Hydrol. Process., 11(8), 825–871, doi:10.1002/(SICI)1099-  
22 1085(19970630)11:8<825::AID-HYP509>3.0.CO;2-G, 1997.
- 23 Magnuson, J. J., Robertson, D. M., Benson, B. J., Wynne, R. H., Livingstone, D. M., Arai, T.,  
24 Assel, R. A., Barry, R. G., Card, V., Kuusisto, E., Granin, N. G., Prowse, T. D., Stewart, K.  
25 M. and Vuglinski, V. S.: Historical Trends in Lake and River Ice Cover in the Northern  
26 Hemisphere, Science, 289(5485), 1743–1746, doi:10.1126/science.289.5485.1743, 2000.
- 27 Maidment, D. R.: Handbook of hydrology, McGraw-Hill., 1993.
- 28 Mantyka-Pringle, C. S., Martin, T. G., Moffatt, D. B., Linke, S. and Rhodes, J. R.:  
29 Understanding and predicting the combined effects of climate change and land-use change on  
30 freshwater macroinvertebrates and fish, J. Appl. Ecol., 51(3), 572–581, doi:10.1111/1365-  
31 2664.12236, 2014.
- 32 Marszelewski, W. and Skowron, R.: Ice cover as an indicator of winter air temperature  
33 changes: case study of the Polish Lowland lakes, Hydrol. Sci. J., 51(2), 336–349,  
34 doi:10.1623/hysj.51.2.336, 2006.
- 35 Mazumder, A. and Taylor, W. D.: Thermal structure of lakes varying in size and water clarity,  
36 Limnol. Oceanogr., 39(4), 968–976, doi:10.4319/lo.1994.39.4.0968, 1994.
- 37 McKay, G.: Problems of measuring and evaluating snow cover, in Proceedings Workshop  
38 Seminar of Snow Hydrology, pp. 49–63, Ottawa, Canada., 1968.



- 1 McKee, T. B., Doesken, N. J., Davey, C. A. and Pielke, Sr: Climate data continuity with  
2 ASOS. Report for period April 1996 through June 2000., 2000.
- 3 Mueller, D. R., Van Hove, P., Antoniadis, D., Jeffries, M. O. and Vincent, W. F.: High Arctic  
4 lakes as sentinel ecosystems: Cascading regime shifts in climate, ice cover, and mixing,  
5 *Limnol. Oceanogr.*, 54(6part2), 2371–2385, doi:10.4319/lo.2009.54.6\_part\_2.2371, 2009.
- 6 North, R., P., Livingstone, D. M., Hari, R. E., Koster, O., Niederhauser, P. and Kipfer, R.:  
7 The physical impact of the late 1980s climate regime shift on Swiss rivers and lakes, *Inland*  
8 *Waters*, 3(3), 341–350, doi:10.5268/IW-3.3.560, 2013.
- 9 North, R. P., North, R. L., Livingstone, D. M., Köster, O. and Kipfer, R.: Long-term changes  
10 in hypoxia and soluble reactive phosphorus in the hypolimnion of a large temperate lake:  
11 consequences of a climate regime shift, *Glob. Change Biol.*, 20(3), 811–823,  
12 doi:10.1111/gcb.12371, 2014.
- 13 Patterson, J. C. and Hamblin, P. F.: Thermal simulation of a lake with winter ice cover,  
14 *Limnol. Oceanogr.*, 33(3), 323–338, doi:10.4319/lo.1988.33.3.0323, 1988.
- 15 Pryor, S. C., Barthelmie, R. J., Young, D. T., Takle, E. S., Arritt, R. W., Flory, D., Gutowski,  
16 W. J., Nunes, A. and Roads, J.: Wind speed trends over the contiguous United States, *J.*  
17 *Geophys. Res. Atmospheres*, 114(D14), D14105, doi:10.1029/2008JD011416, 2009.
- 18 Quayle, W. C., Peck, L. S., Peat, H., Ellis-Evans, J. C. and Harrigan, P. R.: Extreme  
19 Responses to Climate Change in Antarctic Lakes, *Science*, 295(5555), 645–645,  
20 doi:10.1126/science.1064074, 2002.
- 21 Read, J. S., Hamilton, D. P., Desai, A. R., Rose, K. C., MacIntyre, S., Lenters, J. D., Smyth,  
22 R. L., Hanson, P. C., Cole, J. J., Staehr, P. A., Rusak, J. A., Pierson, D. C., Brookes, J. D.,  
23 Laas, A. and Wu, C. H.: Lake-size dependency of wind shear and convection as controls on  
24 gas exchange, *Geophys. Res. Lett.*, 39(9), L09405, doi:10.1029/2012GL051886, 2012.
- 25 Rempfer, J., Livingstone, D. M., Blodau, C., Forster, R., Niederhauser, P. and Kipfer, R.: The  
26 effect of the exceptionally mild European winter of 2006–2007 on temperature and oxygen  
27 profiles in lakes in Switzerland: A foretaste of the future?, *Limnol. Oceanogr.*, 55(5), 2170–  
28 2180, doi:10.4319/lo.2010.55.5.2170, 2010.
- 29 Rice, E., Dam, H. G. and Stewart, G.: Impact of Climate Change on Estuarine Zooplankton:  
30 Surface Water Warming in Long Island Sound Is Associated with Changes in Copepod Size  
31 and Community Structure, *Estuaries Coasts*, 38(1), 13–23, doi:10.1007/s12237-014-9770-0,  
32 2015.
- 33 Robarts, R. D., Waiser, M. J., Hadas, O., Zohary, T. and MacIntyre, S.: Relaxation of  
34 phosphorus limitation due to typhoon-induced mixing in two morphologically distinct basins  
35 of Lake Biwa, Japan, *Limnol. Oceanogr.*, 43(6), 1023–1036, doi:10.4319/lo.1998.43.6.1023,  
36 1998.
- 37 Robertson, D. M.: The use of lake water temperature and ice cover as climatic indicators, PhD  
38 Thesis, University of Wisconsin-Madison, Madison, Wisconsin, USA., 1989.

- 1 Robertson, D. M. and Ragotzkie, R. A.: Changes in the thermal structure of moderate to large  
2 sized lakes in response to changes in air temperature, *Aquat. Sci.*, 52(4), 360–380,  
3 doi:10.1007/BF00879763, 1990.
- 4 Robertson, D. M., Ragotzkie, R. A. and Magnuson, J. J.: Lake ice records used to detect  
5 historical and future climatic changes, *Clim. Change*, 21(4), 407–427,  
6 doi:10.1007/BF00141379, 1992.
- 7 Robertson, D. M., Wynne, R. H. and Chang: Variability in ice cover across the northern  
8 hemisphere during the 1900's associated with El Nino events, *Proc. Int. Limnol. Soc.*, 2002.
- 9 Rodionov, S. N.: A sequential algorithm for testing climate regime shifts, *Geophys. Res.*  
10 *Lett.*, 31(9), doi:10.1029/2004GL019448, 2004.
- 11 Rodionov, S. N.: The problem of red noise in climate regime shift detection, *Geophys. Res.*  
12 *Lett.*, 31, L12707, 2006.
- 13 Rogers, C. K., Lawrence, G. A. and Hamblin, P. F.: Observations and numerical simulation of  
14 a shallow ice-covered midlatitude lake, *Limnol. Oceanogr.*, 40(2), 374–385,  
15 doi:10.4319/lo.1995.40.2.0374, 1995.
- 16 Sala, O. E., Chapin, F. S., Iii, Armesto, J. J., Berlow, E., Bloomfield, J., Dirzo, R., Huber-  
17 Sanwald, E., Huenneke, L. F., Jackson, R. B., Kinzig, A., Leemans, R., Lodge, D. M.,  
18 Mooney, H. A., Oesterheld, M., Poff, N. L., Sykes, M. T., Walker, B. H., Walker, M. and  
19 Wall, D. H.: Global Biodiversity Scenarios for the Year 2100, *Science*, 287(5459), 1770–  
20 1774, doi:10.1126/science.287.5459.1770, 2000.
- 21 Scheffer, M., Carpenter, S., Foley, J. A., Folke, C. and Walker, B.: Catastrophic shifts in  
22 ecosystems, *Nature*, 413(6856), 591–596, doi:10.1038/35098000, 2001.
- 23 Schindler, D. W., Beaty, K. G., Fee, E. J., Cruikshank, D. R., Debruyne, E. R., Findlay, D. L.,  
24 Linsey, G. A., Shearer, J. A., Stainton, M. P. and Turner, M. A.: Effects of climatic warming  
25 on lakes of the central boreal forest, *Science*, 250(4983), 967–970,  
26 doi:10.1126/science.250.4983.967, 1990.
- 27 Schindler, D. W., Bayley, S. E., Parker, B. R., Beaty, K. G., Cruikshank, D. R., Fee, E. J.,  
28 Schindler, E. U. and Stainton, M. P.: The effects of climatic warming on the properties of  
29 boreal lakes and streams at the Experimental Lakes Area, northwestern Ontario, *Limnol.*  
30 *Oceanogr.*, 41(5), 1004–1017, doi:10.4319/lo.1996.41.5.1004, 1996.
- 31 Schneider, P. and Hook, S. J.: Space observations of inland water bodies show rapid surface  
32 warming since 1985, *Geophys. Res. Lett.*, 37(22), L22405, doi:10.1029/2010GL045059,  
33 2010.
- 34 Shimoda, Y., Azim, M. E., Perhar, G., Ramin, M., Kenney, M. A., Sadraddini, S., Gudimov,  
35 A. and Arhonditsis, G. B.: Our current understanding of lake ecosystem response to climate  
36 change: What have we really learned from the north temperate deep lakes?, *J. Gt. Lakes Res.*,  
37 37(1), 173–193, doi:10.1016/j.jglr.2010.10.004, 2011.
- 38 Skowron, R.: Changeability of the ice cover on the lakes of northern Poland in the light of  
39 climatic changes, *Bull. Geogr. Phys. Geogr. Ser.*, (1), 103–124, 2009.

- 1 Soranno, P. A., Carpenter, S. R. and Lathrop, R. C.: Internal phosphorus loading in Lake  
2 Mendota: response to external loads and weather, *Can. J. Fish. Aquat. Sci. - CAN J Fish.*  
3 *AQUAT SCI*, 54(8), 1883–1893, doi:10.1139/cjfas-54-8-1883, 1997.
- 4 Stauffer, R. E. and Armstrong, D. E.: Cycling of iron, manganese, silica, phosphorus, calcium  
5 and potassium in two stratified basins of Shagawa Lake, Minnesota, *Geochim. Cosmochim.*  
6 *Acta*, 50(2), 215–229, doi:10.1016/0016-7037(86)90171-7, 1986.
- 7 Stauffer, R. E. and Lee, G. F.: The role of thermocline migration in regulating algal blooms,  
8 in *Modeling the eutrophication process*, Ann Arbor Science Publishers, Inc, Ann Arbor, MI.,  
9 1973.
- 10 Stefan, H. G., Hondzo, M., Fang, X., Eaton, J. G. and McCormick, J. H.: Simulated long term  
11 temperature and dissolved oxygen characteristics of lakes in the north-central United States  
12 and associated fish habitat limits, *Limnol. Oceanogr.*, 41(5), 1124–1135,  
13 doi:10.4319/lo.1996.41.5.1124, 1996.
- 14 Stenseth, N. C. and Mysterud, A.: Climate, changing phenology, and other life history traits:  
15 Nonlinearity and match–mismatch to the environment, *Proc. Natl. Acad. Sci.*, 99(21), 13379–  
16 13381, doi:10.1073/pnas.212519399, 2002.
- 17 Stewart, K. M.: Physical limnology of some Madison lakes, PhD Thesis, University of  
18 Wisconsin-Madison, Madison, Wisconsin, USA., 1965.
- 19 Tanentzap, A. J., Hamilton, D. P. and Yan, N. D.: Calibrating the Dynamic Reservoir  
20 Simulation Model (DYRESM) and filling required data gaps for one-dimensional thermal  
21 profile predictions in a boreal lake, *Limnol. Oceanogr. Methods*, 5(12), 484–494,  
22 doi:10.4319/lom.2007.5.484, 2007.
- 23 Tanentzap, A. J., Yan, N. D., Keller, B., Girard, R., Heneberry, J., Gunn, J. M., Hamilton, D.  
24 P. and Taylor, P. A.: Cooling lakes while the world warms: Effects of forest regrowth and  
25 increased dissolved organic matter on the thermal regime of a temperate, urban lake, *Limnol.*  
26 *Oceanogr.*, 53(1), 404–410, doi:10.4319/lo.2008.53.1.0404, 2008.
- 27 Tomé, A. R. and Miranda, P. M. A.: Piecewise linear fitting and trend changing points of  
28 climate parameters, *Geophys. Res. Lett.*, 31(2), L02207, doi:10.1029/2003GL019100, 2004.
- 29 Toms, J. D. and Lesperance, M. L.: Piecewise regression: a tool for identifying ecological  
30 thresholds, *Ecology*, 84(8), 2034–2041, doi:10.1890/02-0472, 2003.
- 31 Van Cleave, K., Lenters, J. D., Wang, J. and Verhamme, E. M.: A regime shift in Lake  
32 Superior ice cover, evaporation, and water temperature following the warm El Niño winter of  
33 1997–1998, *Limnol. Oceanogr.*, 59(6), 1889–1898, doi:10.4319/lo.2014.59.6.1889, 2014.
- 34 Vavrus, S. J., Wynne, R. H. and Foley, J. A.: Measuring the sensitivity of southern Wisconsin  
35 lake ice to climate variations and lake depth using a numerical model, *Limnol. Oceanogr.*,  
36 41(5), 822–831, doi:10.4319/lo.1996.41.5.0822, 1996.
- 37 Wan, H., Wang, X. L. and Swail, V. R.: Homogenization and trend analysis of Canadian near-  
38 surface wind speeds, *J. Clim.*, 23(5), 1209–1225, doi:10.1175/2009JCLI3200.1, 2010.

- 1 Wilhelm, S. and Adrian, R.: Impact of summer warming on the thermal characteristics of a  
2 polymictic lake and consequences for oxygen, nutrients and phytoplankton, *Freshw. Biol.*,  
3 53(2), 226–237, doi:10.1111/j.1365-2427.2007.01887.x, 2008.
- 4 Williams, D. T., Drummond, G. R., Ford, D. E. and Robey, D. L.: Determination of light  
5 extinction coefficients in lakes and reservoirs, in *Proceedings of the Symposium on Surface*  
6 *Water Impoundments*, pp. 1329–1335, Minneapolis, MN, USA., 1980.
- 7 Williams, G., Layman, K. L. and Stefan, H. G.: Dependence of lake ice covers on climatic,  
8 geographic and bathymetric variables, *Cold Reg. Sci. Technol.*, 40(3), 145–164,  
9 doi:10.1016/j.coldregions.2004.06.010, 2004.
- 10 Winslow, L. A., Read, J. S., Hansen, G. J. A. and Hanson, P. C.: Small lakes show muted  
11 climate change signal in deepwater temperatures, *Geophys. Res. Lett.*, 42(2), 2014GL062325,  
12 doi:10.1002/2014GL062325, 2015.
- 13 Wrona, F. J., Prowse, T. D., Reist, J. D., Hobbie, J. E., Lévesque, L. M. J. and Vincent, W. F.:  
14 Climate change effects on aquatic biota, ecosystem structure and function, *Ambio*, 35(7),  
15 359–369, 2006.
- 16 Yan, N. D.: Effects of changes in pH on transparency and thermal regimes of Lohi Lake, near  
17 Sudbury, Ontario, *Can. J. Fish. Aquat. Sci.*, 40(5), 621–626, doi:10.1139/f83-081, 1983.
- 18 Yeates, P. S. and Imberger, J.: Pseudo two-dimensional simulations of internal and boundary  
19 fluxes in stratified lakes and reservoirs, *Int. J. River Basin Manag.*, 1(4), 297–319,  
20 doi:10.1080/15715124.2003.9635214, 2003.
- 21 Ying, L., Shen, Z. and Piao, S.: The recent hiatus in global warming of the land surface:  
22 Scale-dependent breakpoint occurrences in space and time: SCALE-DEPENDENT HIATUS  
23 IN SPACE AND TIME, *Geophys. Res. Lett.*, 42(15), 6471–6478,  
24 doi:10.1002/2015GL064884, 2015.

25

- 1 Table 1: Values of DYRESM-ICE parameters and model simulation specifications for both
- 2 hydrodynamic and ice cover portions of the model.

### Hydrodynamic Model Parameters

|                                                     | <b>Value</b>                   |
|-----------------------------------------------------|--------------------------------|
| albedo                                              | 0.08 <sup>i,ii</sup>           |
| bulk aerodynamic momentum transport coefficient     | 0.00139 <sup>ii</sup>          |
| critical wind speed ( $\text{m s}^{-1}$ )           | 4.3 <sup>ii</sup>              |
| effective surface area coefficient ( $\text{m}^2$ ) | $1 \times 10^7$ <sup>iii</sup> |
| emissivity of water surface                         | 0.96 <sup>iv</sup>             |
| potential energy mixing efficiency                  | 0.2 <sup>i,ii</sup>            |
| shear production efficiency                         | 0.06 <sup>i, ii, iii</sup>     |
| vertical mixing coefficient                         | 200 <sup>iii</sup>             |
| wind stirring efficiency                            | 0.8 <sup>ii</sup>              |
| minimum layer thickness                             | 0.125                          |
| maximum layer thickness                             | 0.6 <sup>ii</sup>              |
| vertical light attenuation coefficient              | variable <sup>v</sup>          |

### Ice Model Parameters

|                                                                                  | <b>Value</b>            |
|----------------------------------------------------------------------------------|-------------------------|
| waveband 1, snow ice light extinction ( $\text{m}^{-1}$ )                        | 3.8 <sup>vi</sup>       |
| waveband 2, snow ice light extinction ( $\text{m}^{-1}$ )                        | 20 <sup>vi, vii</sup>   |
| waveband 1, blue ice light extinction ( $\text{m}^{-1}$ )                        | 1.5 <sup>vi, vii</sup>  |
| waveband 2, blue ice light extinction ( $\text{m}^{-1}$ )                        | 20 <sup>vi, vii</sup>   |
| waveband 1, snow light extinction ( $\text{m}^{-1}$ )                            | 6 <sup>vi, vii</sup>    |
| waveband 2, snow light extinction ( $\text{m}^{-1}$ )                            | 20 <sup>vi, vii</sup>   |
| distance of heat transfer, ice-water (m)                                         | 0.039 <sup>viii</sup>   |
| density, snow ice ( $\text{kg m}^{-3}$ )                                         | 890 <sup>vi</sup>       |
| density, blue ice ( $\text{kg m}^{-3}$ )                                         | 917 <sup>vi, vii</sup>  |
| density, snow ( $\text{kg m}^{-3}$ )                                             | variable <sup>ix</sup>  |
| compaction coefficient                                                           | variable <sup>vi</sup>  |
| thermal conductivity, snow ice ( $\text{W m}^{-1} \text{ }^\circ\text{C}^{-1}$ ) | 2.0 <sup>vi</sup>       |
| thermal conductivity, blue ice ( $\text{W m}^{-1} \text{ }^\circ\text{C}^{-1}$ ) | 2.3 <sup>vi, vii</sup>  |
| thermal conductivity, snow ( $\text{W m}^{-1} \text{ }^\circ\text{C}^{-1}$ )     | variable <sup>x</sup>   |
| thermal conductivity, sediment ( $\text{W m}^{-1} \text{ }^\circ\text{C}^{-1}$ ) | 1.2 <sup>vi</sup>       |
| thermal conductivity, water ( $\text{W m}^{-1} \text{ }^\circ\text{C}^{-1}$ )    | 0.57 <sup>vi, vii</sup> |

sources: <sup>i</sup> Antenucci and Imerito, 2003; <sup>ii</sup> Tanentzap et al., 2007; <sup>iii</sup> Yeates and Imberger, 2003; <sup>iv</sup> Imberger and Patterson, 1981; <sup>v</sup> Williams et al., 1980; <sup>vi</sup> Rogers et al., 1995; <sup>vii</sup> Patterson and Hamblin, 1988; <sup>viii</sup> Vavrus et al., 1996; <sup>ix</sup> McKay, 1968; <sup>x</sup> Ashton, 1986

3

- 1 **Table 2.** Mean values of climate drivers and lake variables of three hypothesized periods during 1911–2014. Asterisks (\*) mark significant  
 2 differences between two period ( $p < 0.05$ ).

| Driver/Variable                         | Unit                    | Period       |              |              | Difference in Mean |             |             |
|-----------------------------------------|-------------------------|--------------|--------------|--------------|--------------------|-------------|-------------|
|                                         |                         | (1)1911-1980 | (2)1981-1993 | (3)1994-2014 | (1) and (2)        | (2) and (3) | (1) and (3) |
| <b>Lake driver</b>                      |                         |              |              |              |                    |             |             |
| Air temperature (slope)                 | °C decade <sup>-1</sup> | 0.081        | 0.334        | 0.334        |                    |             |             |
| Wind speed                              | m s <sup>-1</sup>       | 4.44         | 4.44         | 3.74         |                    |             |             |
| <b>Lake variables</b>                   |                         |              |              |              |                    |             |             |
| Maximum ice thickness                   | cm                      | 49.8         | 44.9         | 40.7         | -4.9               | -4.2        | -9.1*       |
| Ice-on date (model)                     | Date                    | 21-Dec       | 23-Dec       | 29-Dec       | 2 days             | 6 days      | 8 days*     |
|                                         | Date (observation)      | 21-Dec       | 24-Dec       | 29-Dec       | 3 days             | 5 days      | 8 days*     |
| Ice-off date (model)                    | Date                    | 9-Apr        | 2-Apr        | 30-Mar       | -7 days            | -3 days     | -10 days*   |
|                                         | Date (observation)      | 3-Apr        | 27-Mar       | 26-Mar       | -7 days            | -1 days     | -8 days*    |
| Ice duration (model)                    | Days                    | 108.7        | 99.5         | 91.1         | -9.2*              | -8.4*       | -17.6*      |
|                                         | Days (observation)      | 103.2        | 92.9         | 85.6         | -10.3*             | -7.3*       | -17.6*      |
| Under-ice water temperature             | °C                      | 1.74         | 1.81         | 2.08         | 0.07               | 0.27        | 0.34*       |
| Freeze-over water temperature           | °C                      | 1.03         | 1.14         | 1.66         | 0.11               | 0.52        | 0.63*       |
| Stratification onset date               |                         | 24-May       | 17-May       | 18-May       | -7 days            | -1 days     | -6 days     |
| Mid-summer epilimnetic temperature      | °C                      | 23.0         | 23.2         | 23.4         | 0.2                | 0.2         | 0.4         |
| Mid-summer hypolimnetic temperature     | °C                      | 12.0         | 11.8         | 10.9         | -0.2               | -0.9*       | -1.1*       |
| Epilimnion-hypolimnion temp. difference | °C                      | 10.9         | 11.4         | 12.5         | 0.5                | 1.1         | 1.6*        |
| Hypolimnetic heating (1 July–31 August) | °C                      | 0.699        | 0.688        | 0.583        | -0.011             | -0.105      | -0.116      |
| Turnover date                           | Date                    | 20-Sept      | 21-Sept      | 3-Oct        | 1 day              | 12 days*    | 13 days*    |
| Stratification Duration                 | Days                    | 119.4        | 127.4        | 138.6        | 8.0                | 11.2        | 19.2*       |

1 Table 3. Averaging periods for lake drivers used for calculating correlation coefficients of  
 2 each pair of variables.

| Lake variables                  | Air temperature/wind speed | Secchi depth <sup>1</sup> |
|---------------------------------|----------------------------|---------------------------|
| Ice-on date                     | November – December        | 13 October – ice-on       |
| Ice-off date                    | February – March           | ice-on – ice-off          |
| Max. ice thickness              | January – March            | ice-on – ice-off          |
| Freeze-over water temperature   | November – December        | 13 October – ice-on       |
| Date of stratification onset    | April – May                | ice-out – 10 May          |
| Summer epilimnetic temperature  | 16 July – 15 August        | 30 June – 2 September     |
| Summer hypolimnetic temperature | May                        | ice-out – 30 June         |
| Hypolimnetic heating            | July – August              | 30 June – 2 September     |
| Date of fall turnover           | September                  | 3 September – 12 October  |

<sup>1</sup>Six seasonal periods defined in Lathrop et al. (1996)

3

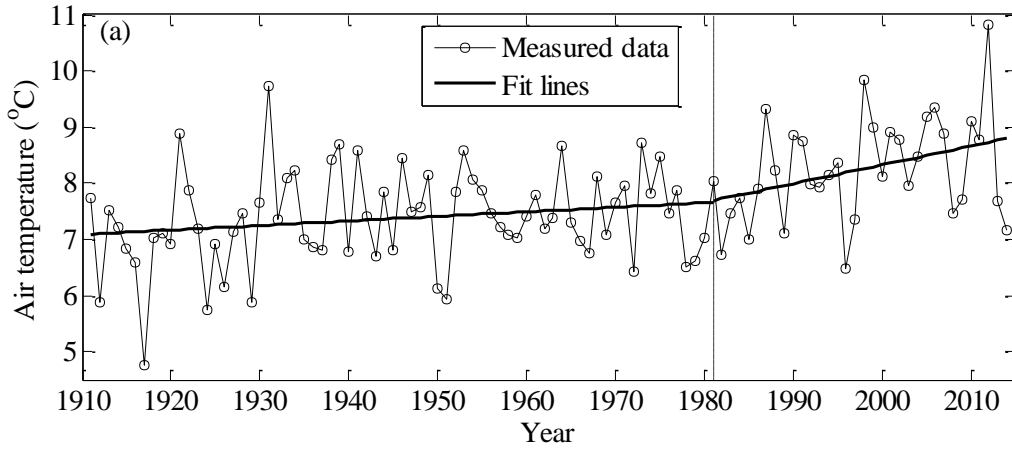

1

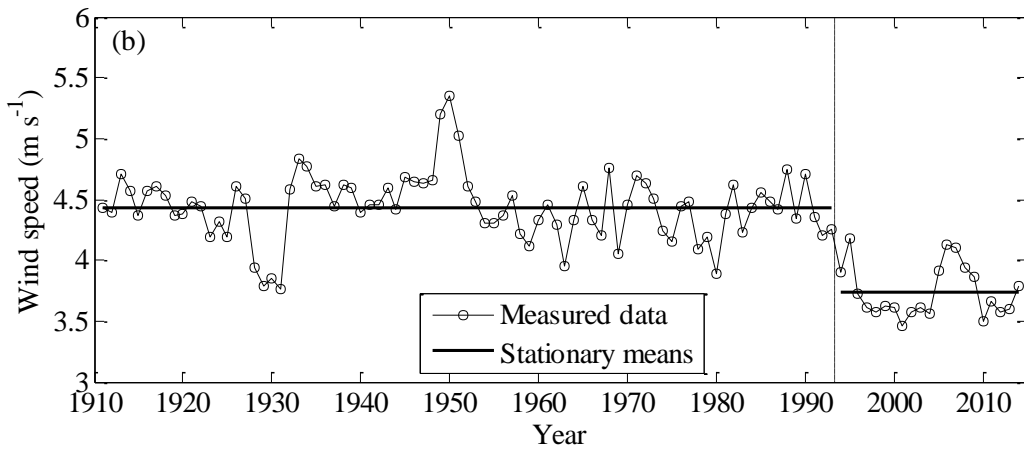

2

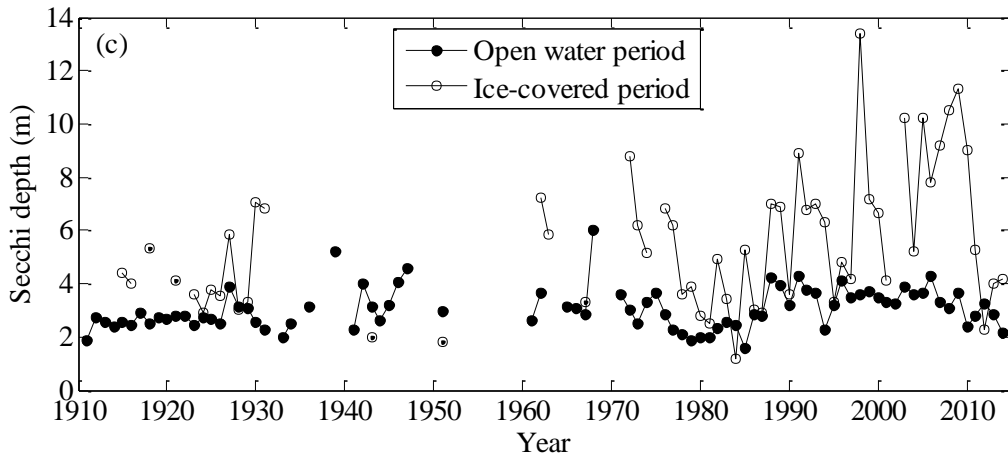

3

4 Figure 1: Historical record of annual average (a) air temperature and (b) wind speed in  
 5 Madison, WI, USA, and (c) Secchi depth in Lake Mendota.

6



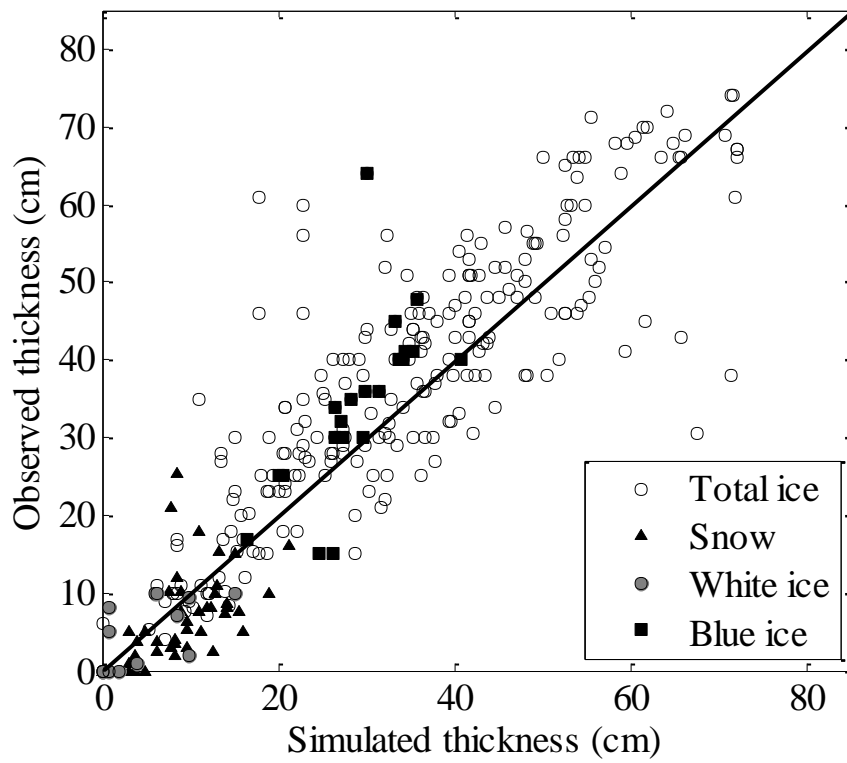

1

2 Figure 2. Comparison between observations and simulated total ice, snow cover, white ice,  
3 and blue ice

4

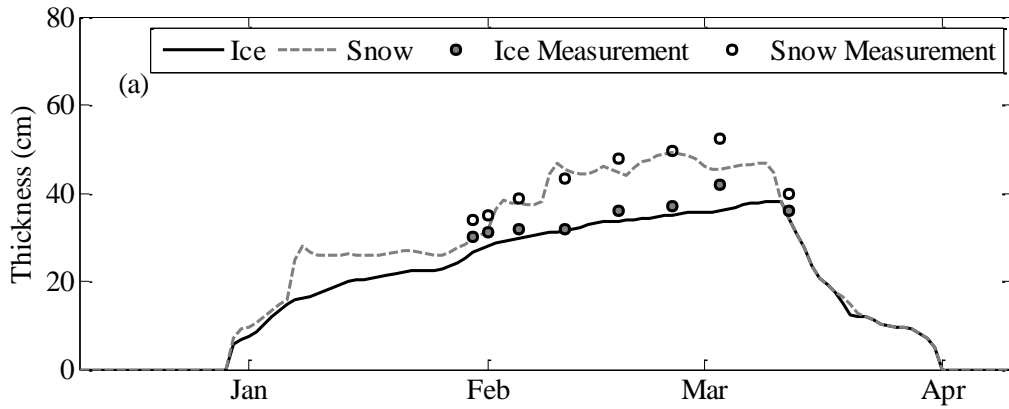

1

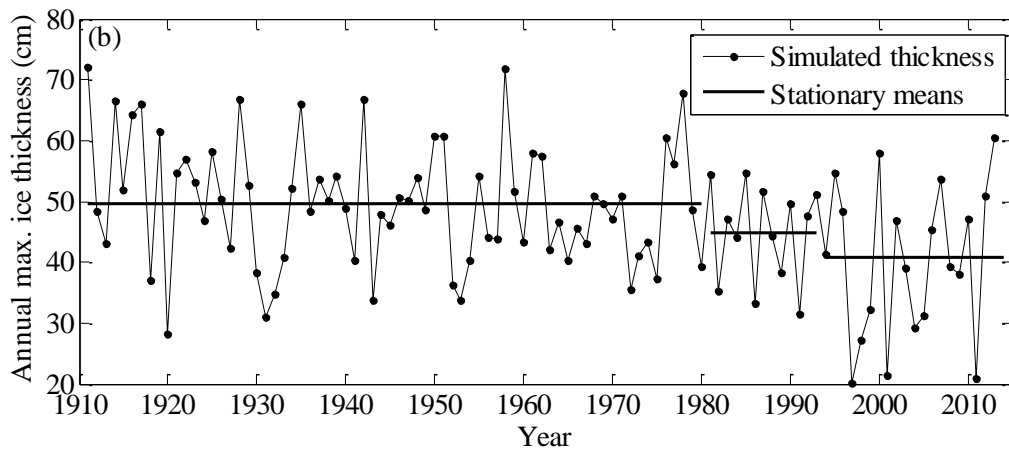

2

3 Figure 3: (a) simulated ice and snow with measured values for the winter 2009-2010 and (b)  
 4 simulated annual maximum total ice thickness.

5

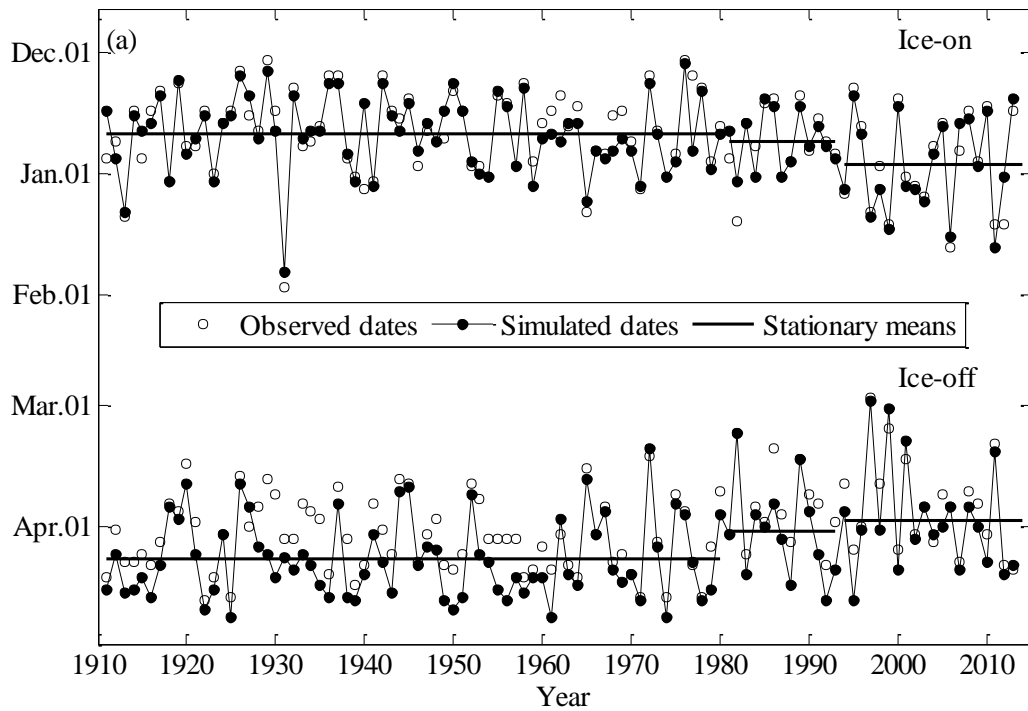

1

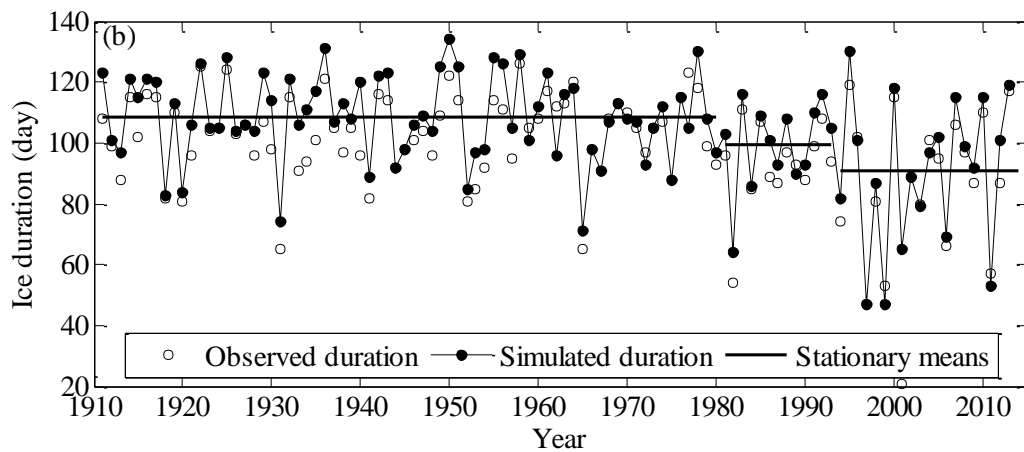

2

3 Figure 4: Observed and simulated (a) ice-on and ice-off dates and (b) ice cover duration. The  
 4 annual ice cover was plotted in the first year of the winter, e.g., the winter 1911-1912 was  
 5 plotted in the year 1911. Stationary means for three selected periods are denoted by solid  
 6 lines.

7

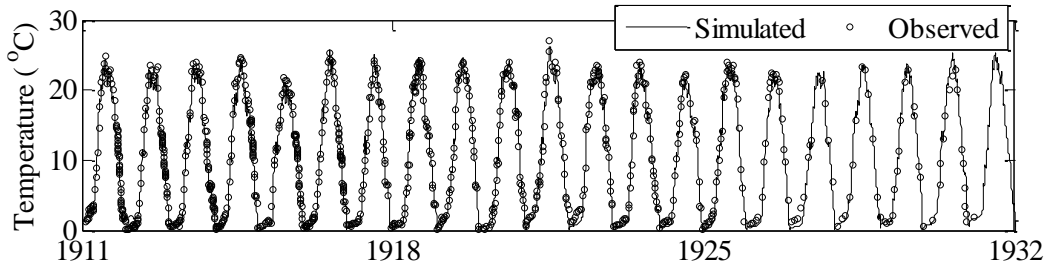

1

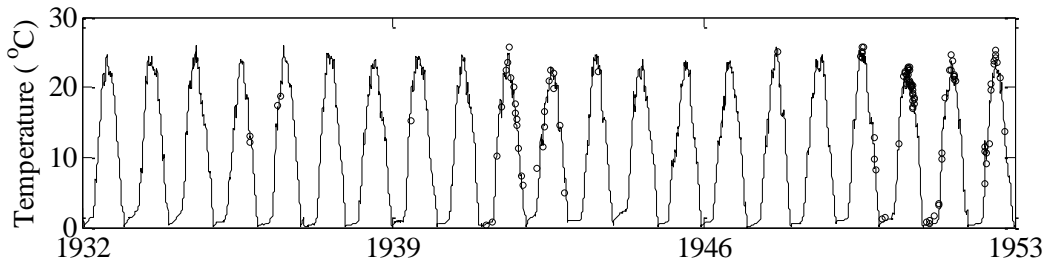

2

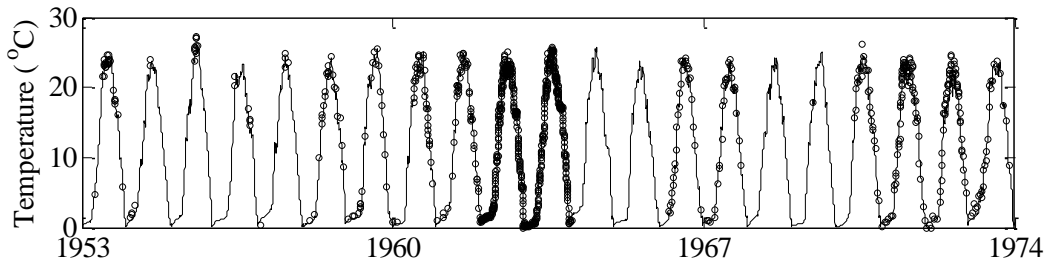

3

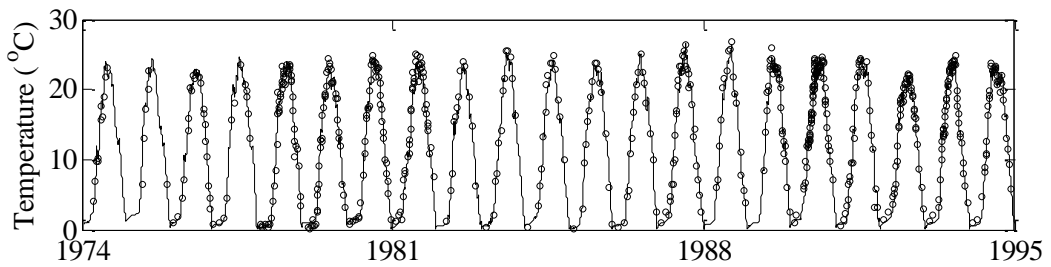

4

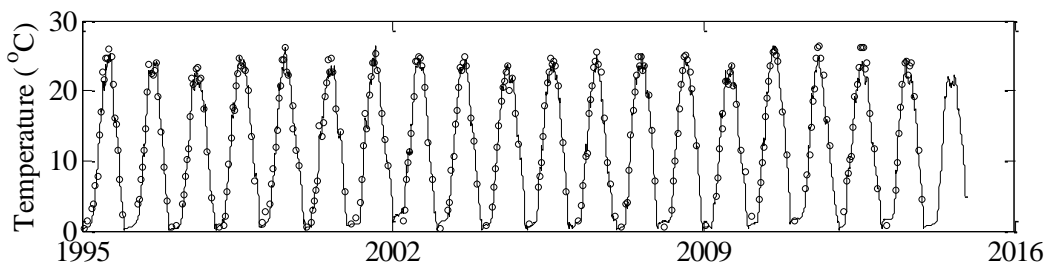

5

6 Figure 5: Time series of the simulated and observed volume-weighted near-surface  
 7 (epilimnetic) temperature (0–10m) from 1911–2014.

8

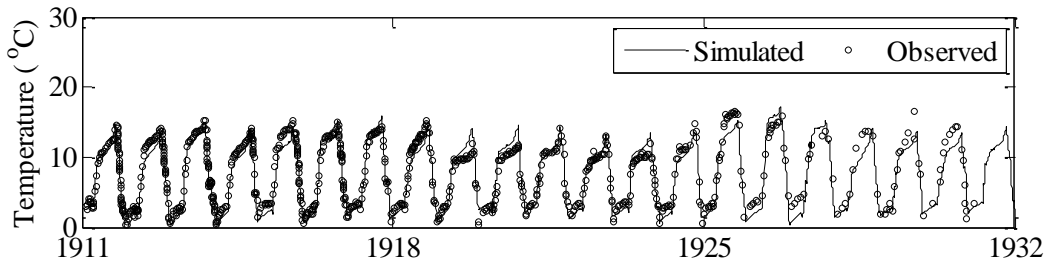

1

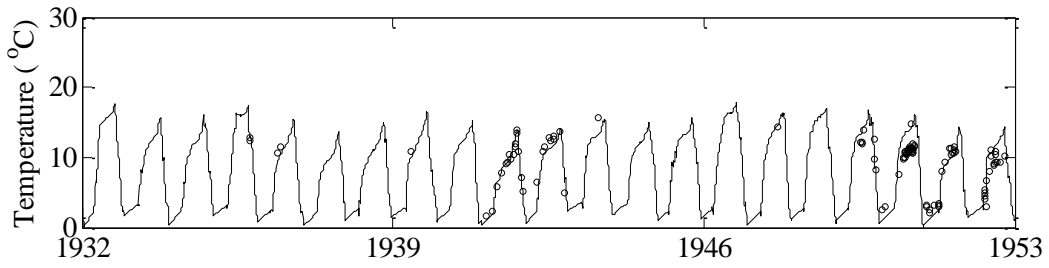

2

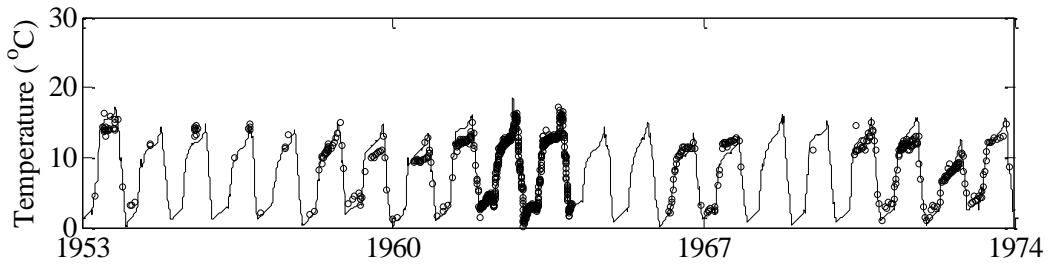

3

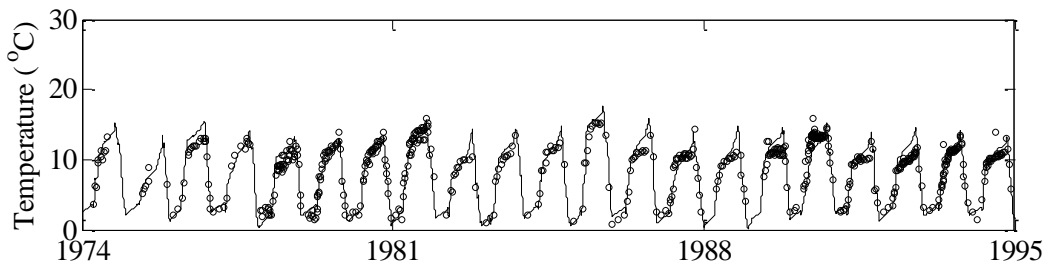

4

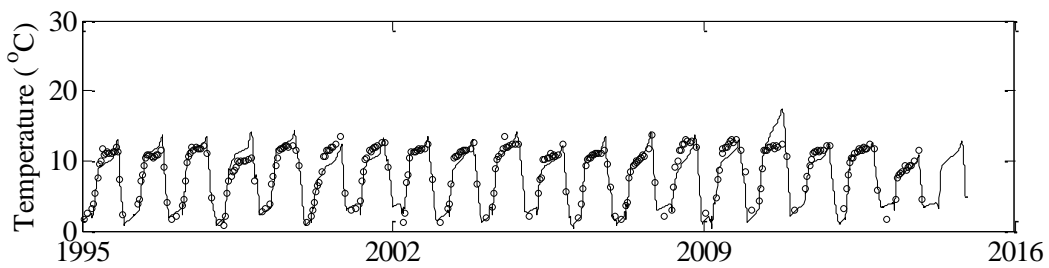

5

6 Figure 6: Time series of the simulated and observed volume-weighted near-bottom  
 7 (hypolimnetic) temperatures (20–25 m) from 1911–2014.

8

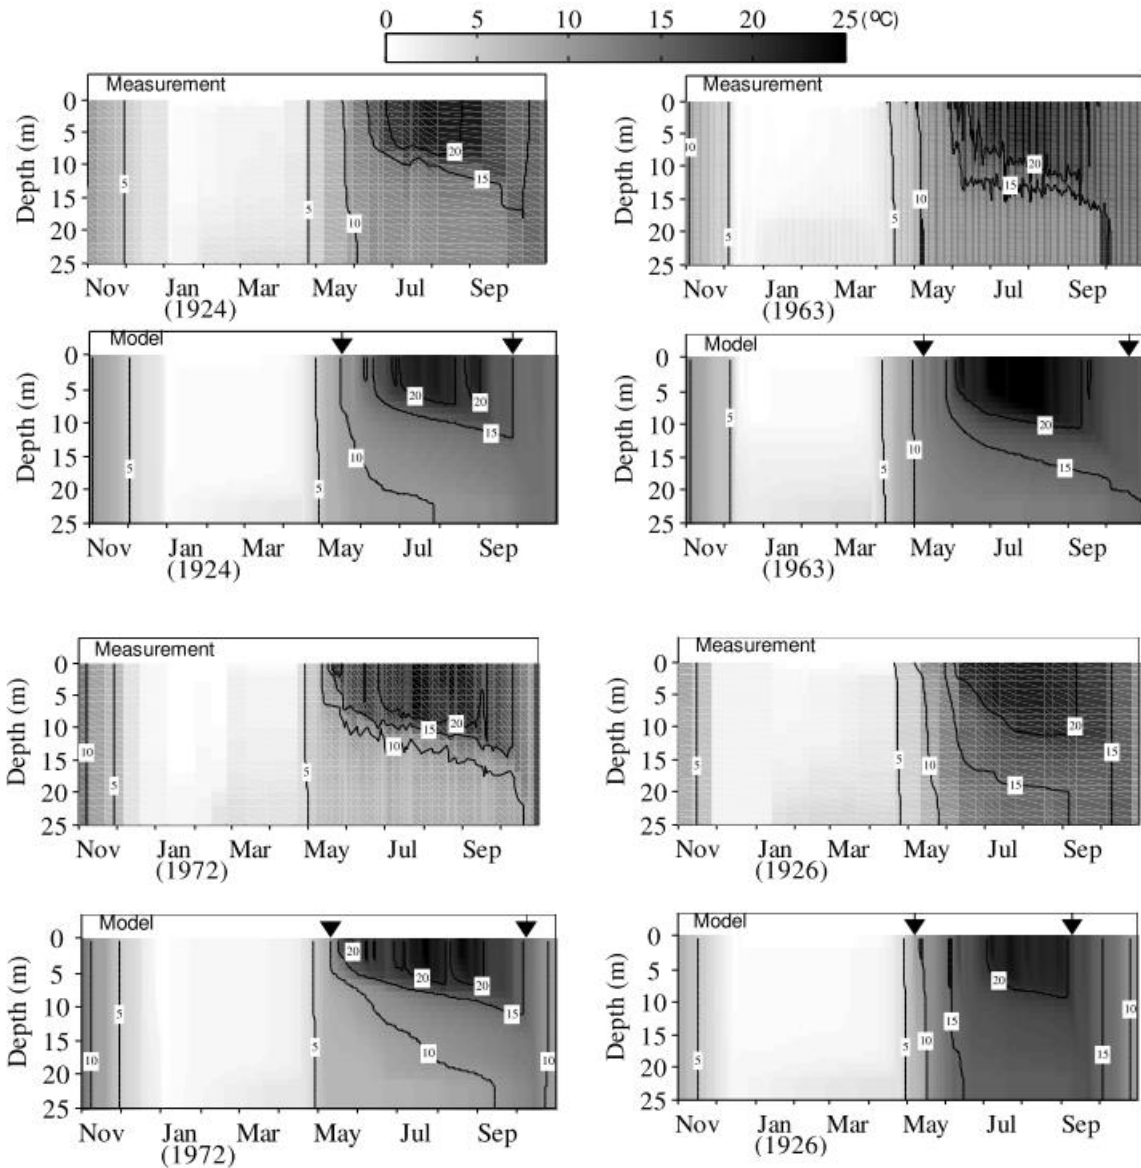

1

2

3 Figure 7: Comparison between the measured and simulated water temperatures as a function  
 4 of time and depth under the cold epilimnetic year (1924), warm epilimnetic year (1963), cold  
 5 hypolimnetic year (1972), and warm hypolimnetic year (1926) in Lake Mendota. Arrows  
 6 mark the dates of onset of stratification and fall turnover.

7

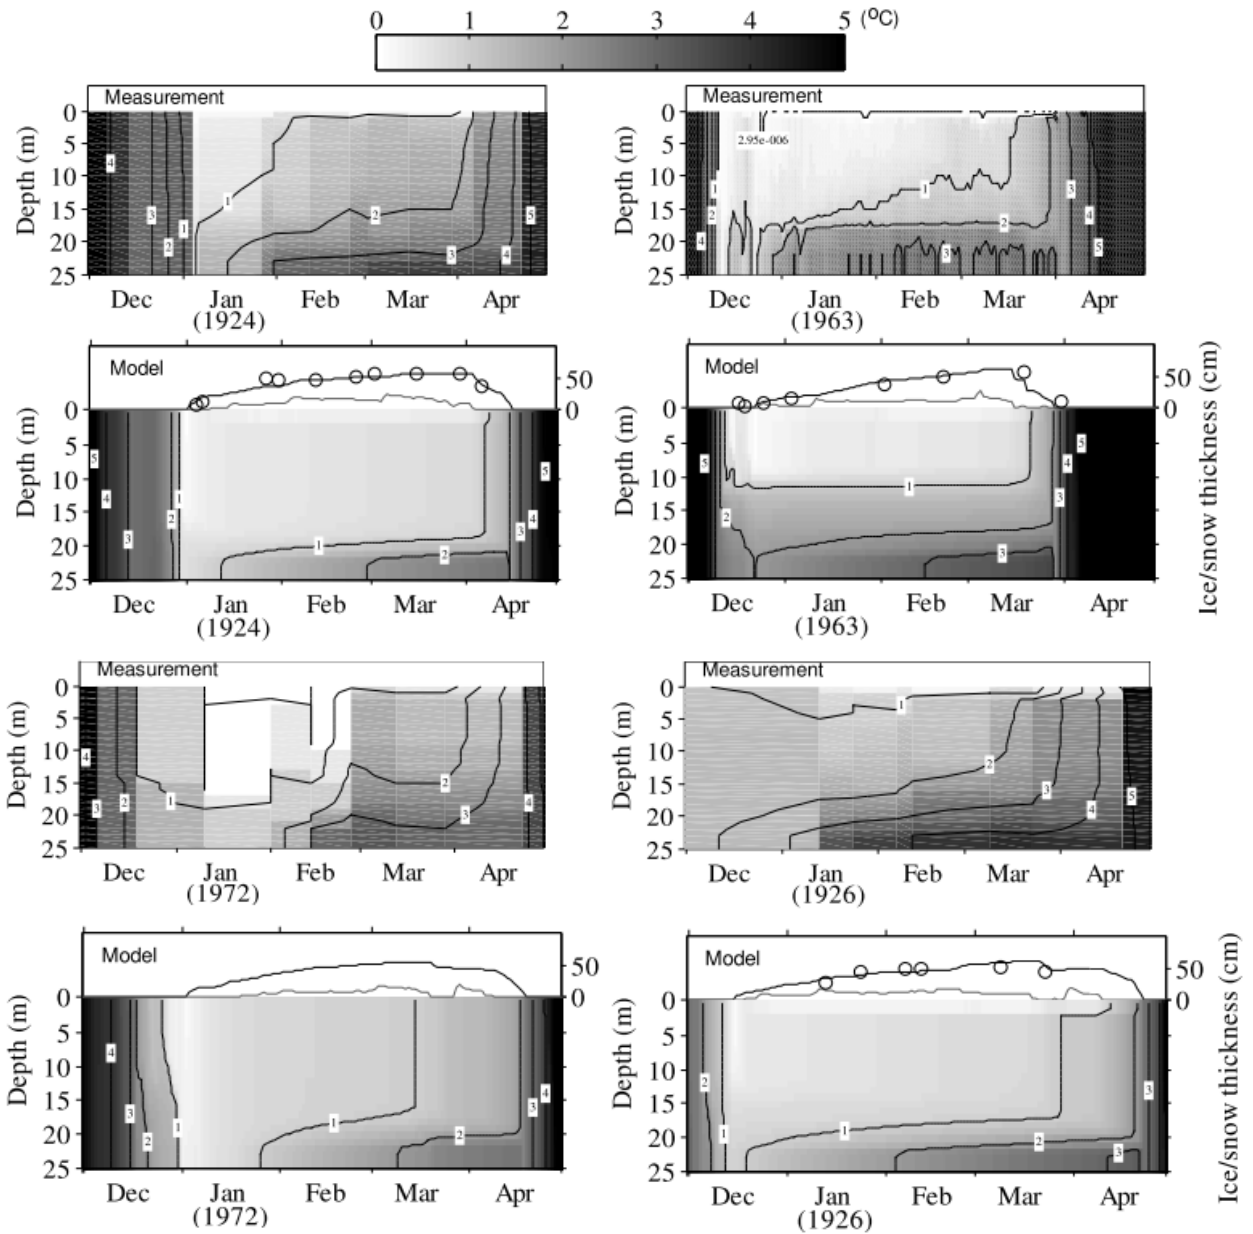

1

2

3 Figure 8: Comparison between the measured and simulated water temperatures and ice/snow  
 4 thickness under the cold epilimnetic year (1924), warm epilimnetic year (1963), cold  
 5 hypolimnetic year (1972), and warm hypolimnetic year (1926) in Lake Mendota during the  
 6 ice-covered period. Time series are simulated ice and snow thickness (solid lines) with  
 7 measurements (open circles).

8

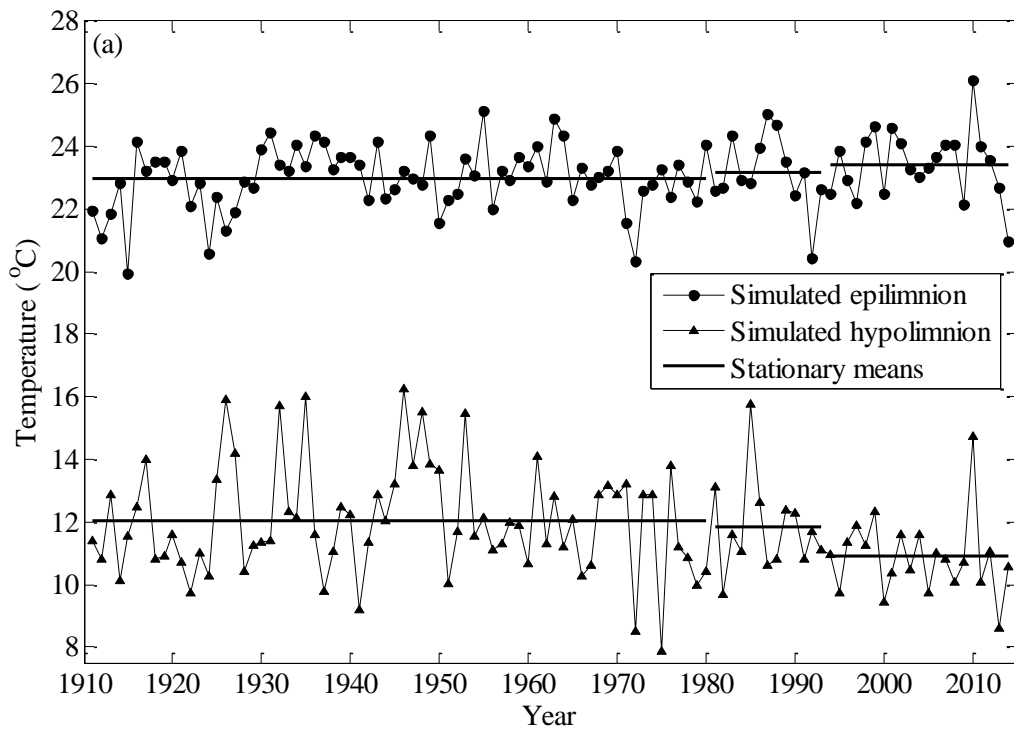

1

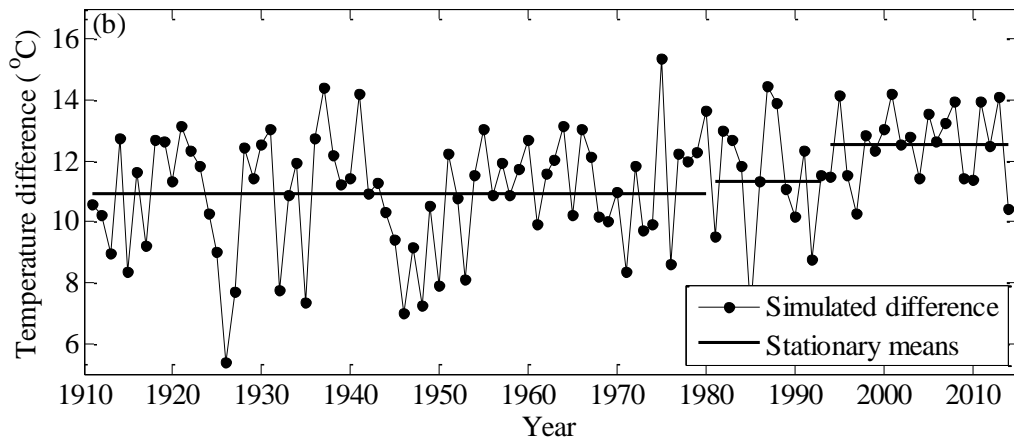

2

3 Figure 9: (a) Simulated mid-summer (16 July – 15 August) volume-averaged epilimnion and  
 4 hypolimnion temperatures, and (b) epilimnion-hypolimnion temperature difference.  
 5 Stationary means for three selected periods are denoted by solid lines

6



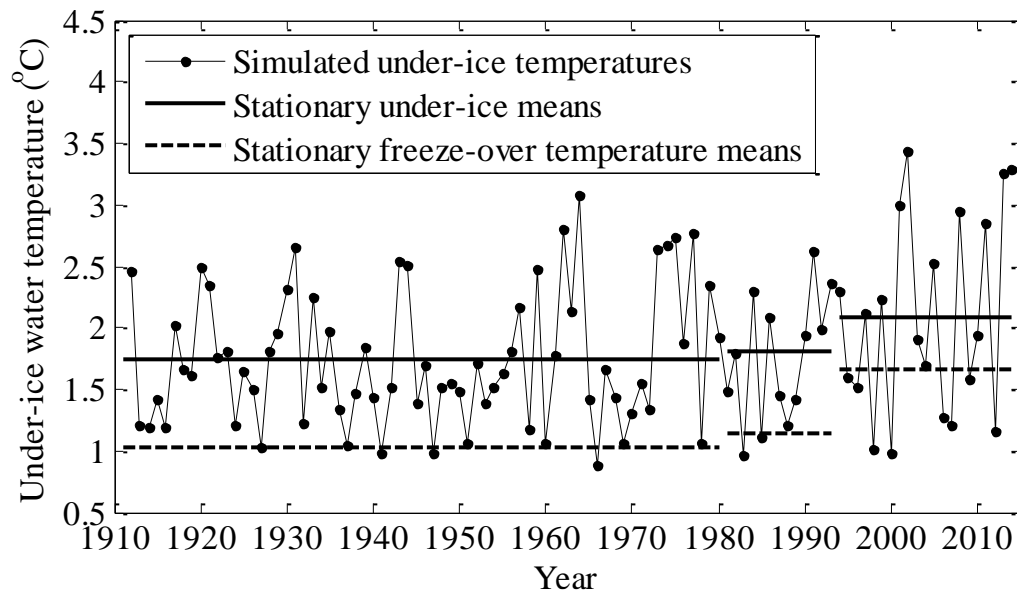

1

2 Figure 10: Simulated mean under-ice water temperatures (volume-weighted averages of all  
 3 depths) during the ice-covered period between 1911 and 2014. The stationary means for three  
 4 selected periods of under-ice water temperatures and freeze-over water temperatures are also  
 5 plotted.

6

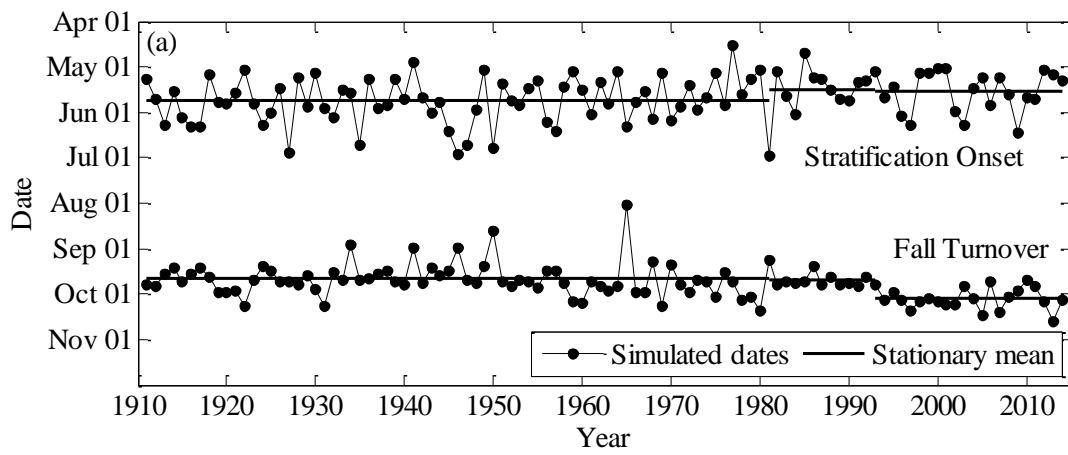

1

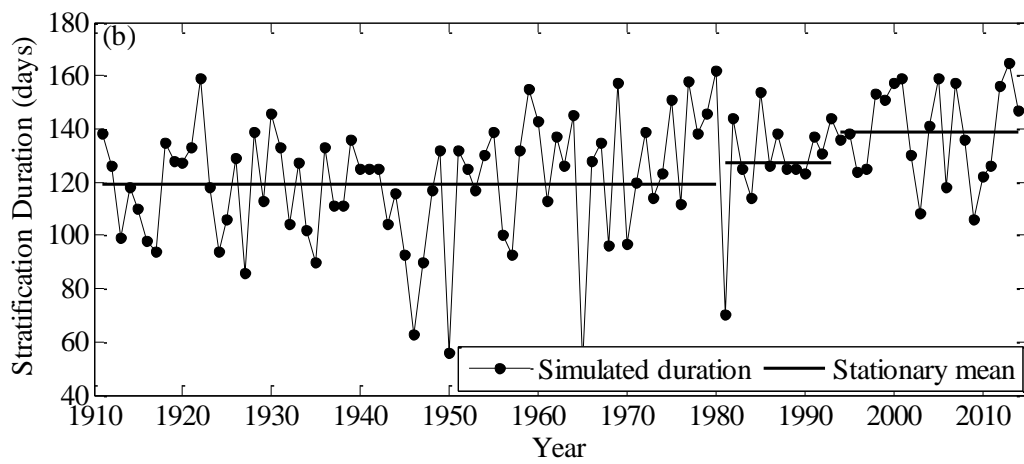

2

3 Figure 11: (a) Simulated date of stratification onset and fall turnover and (b) stratification  
 4 duration. Stationary means for three selected periods are denoted by solid lines.

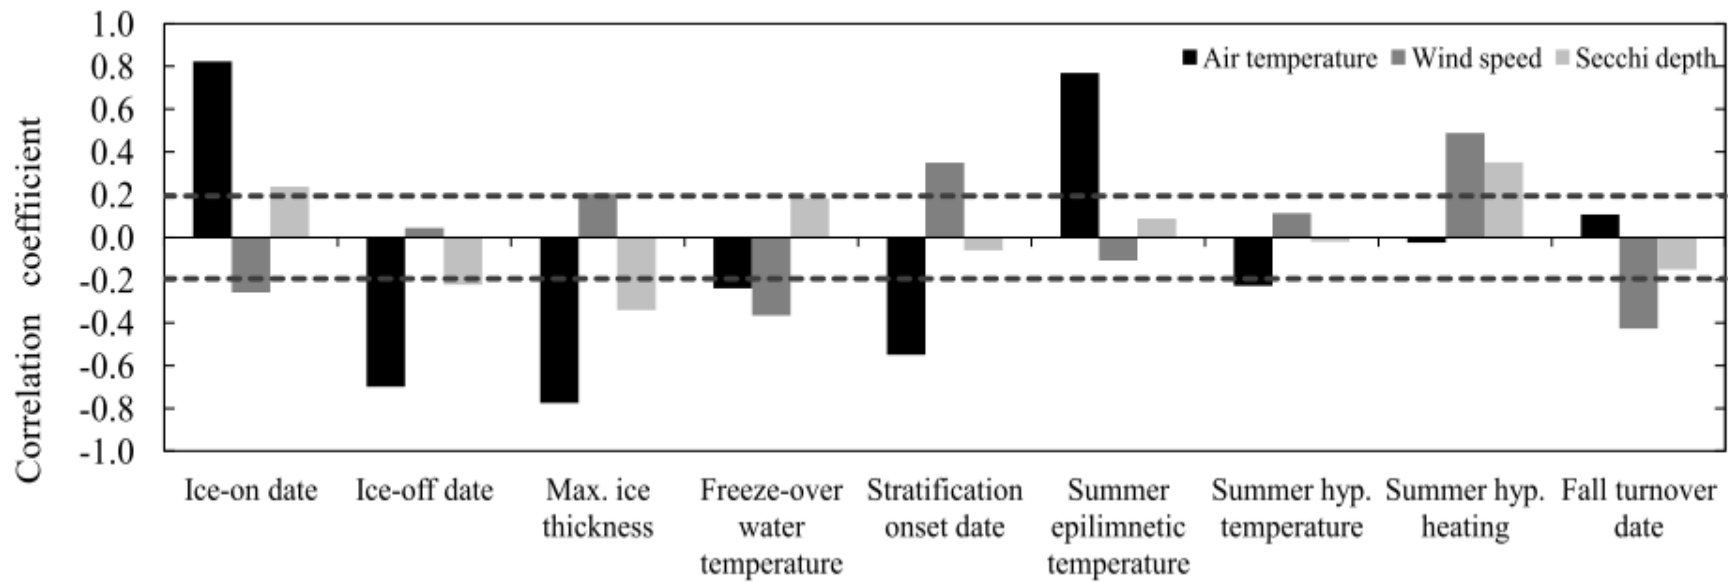

1

2 Figure 12: Correlation coefficients between lake variables and drivers. The critical value (dashed lines) for significant correlation ( $p < 0.05$ ) is  
 3 0.193 ( $n = 104$ ).
